# Supplementary material for: Properties of Protein Drug Target Classes
Source: PLoS One. 2015 Mar 30;10(3):e0117955. doi: 10.1371/journal.pone.0117955 (PMC4379170; doi:10.1371/journal.pone.0117955)
Supplement: S1 Supplementary Information — (XLSX) [file pone.0117955.s001.xlsx]

## Sheet: AllTargets
P49589	Positive
O43837	Positive
P98194	Positive
Q969G6	Positive
P13500	Positive
P08174	Positive
P06729	Positive
Q08426	Positive
P07766	Positive
P30939	Positive
P08473	Positive
O00767	Positive
Q16099	Positive
P48448	Positive
O75469	Positive
P11388	Positive
P24666	Positive
Q16850	Positive
P14550	Positive
P35367	Positive
P47989	Positive
P38606	Positive
Q13936	Positive
P41180	Positive
O15375	Positive
P21589	Positive
P41439	Positive
Q9NPA2	Positive
P20645	Positive
P08559	Positive
Q9Y271	Positive
P43353	Positive
P28335	Positive
P30542	Positive
O43570	Positive
P28062	Positive
P01106	Positive
P01138	Positive
Q08257	Positive
P43116	Positive
O60294	Positive
Q00975	Positive
P22830	Positive
P33681	Positive
O43246	Positive
P05108	Positive
Q96I99	Positive
Q96Q40	Positive
Q14831	Positive
Q99460	Positive
P00966	Positive
P14902	Positive
P23434	Positive
P06241	Positive
P33527	Positive
P14784	Positive
Q02750	Positive
P16473	Positive
P29074	Positive
Q01959	Positive
O60760	Positive
P19440	Positive
P09601	Positive
P08243	Positive
O94925	Positive
Q9Y4W6	Positive
Q16478	Positive
Q9BZW2	Positive
P35626	Positive
Q9Y234	Positive
P15509	Positive
P17540	Positive
P30411	Positive
Q92569	Positive
Q13555	Positive
Q05940	Positive
Q9UBX3	Positive
Q7LG56	Positive
Q14500	Positive
Q9H1K4	Positive
P25101	Positive
O94760	Positive
O75600	Positive
P00740	Positive
P0DJD9	Positive
Q96PR1	Positive
Q9UI33	Positive
P12259	Positive
Q9Y5N1	Positive
P06213	Positive
P22001	Positive
P10745	Positive
P05164	Positive
P08519	Positive
Q6TGC4	Positive
P51170	Positive
P30273	Positive
Q96Q83	Positive
P02585	Positive
Q92753	Positive
P00387	Positive
O60779	Positive
O60840	Positive
Q13639	Positive
P04049	Positive
P00519	Positive
O75489	Positive
Q9H4Y5	Positive
Q9NPA1	Positive
Q9UDX4	Positive
P08263	Positive
P61626	Positive
Q9Y617	Positive
O14646	Positive
P34969	Positive
P28065	Positive
P22607	Positive
P45954	Positive
P53597	Positive
Q16718	Positive
P11142	Positive
P20839	Positive
P01008	Positive
P12271	Positive
Q9UBS5	Positive
P41252	Positive
P48443	Positive
P50052	Positive
O76082	Positive
Q9BXI2	Positive
P10620	Positive
O15217	Positive
P10398	Positive
O43776	Positive
P78348	Positive
Q9H936	Positive
P50281	Positive
P06401	Positive
Q14289	Positive
P25098	Positive
Q6N063	Positive
P30872	Positive
O60512	Positive
P49019	Positive
P04181	Positive
O75891	Positive
Q9NP56	Positive
P42684	Positive
Q8TC12	Positive
O00408	Positive
P09874	Positive
P01589	Positive
Q86W47	Positive
P50213	Positive
O95865	Positive
Q9UJ70	Positive
P51970	Positive
P09238	Positive
P43004	Positive
P08185	Positive
Q15738	Positive
Q15111	Positive
P21397	Positive
O15067	Positive
Q93088	Positive
Q08881	Positive
P08908	Positive
P09210	Positive
Q8N0U8	Positive
O43526	Positive
P13631	Positive
Q14833	Positive
P08588	Positive
P02792	Positive
O75311	Positive
P49788	Positive
Q9Y4U1	Positive
P43003	Positive
O00217	Positive
P09622	Positive
P29475	Positive
P54802	Positive
P26439	Positive
P07333	Positive
Q08289	Positive
P32929	Positive
P13196	Positive
Q9ULC6	Positive
O75715	Positive
O15530	Positive
P35462	Positive
Q9BZV2	Positive
P35346	Positive
O95864	Positive
P12724	Positive
P30559	Positive
P03905	Positive
P40238	Positive
P43166	Positive
P18858	Positive
P24046	Positive
Q8TE23	Positive
O75251	Positive
P21266	Positive
P29275	Positive
Q96PD7	Positive
P22888	Positive
P67775	Positive
P53004	Positive
Q13423	Positive
O60939	Positive
P09455	Positive
Q9Y285	Positive
P20813	Positive
P19320	Positive
Q9BY49	Positive
Q9NR82	Positive
P22894	Positive
P30085	Positive
Q9BYC2	Positive
P05412	Positive
P09917	Positive
P28482	Positive
P43220	Positive
O15382	Positive
P04818	Positive
O95342	Positive
P16109	Positive
Q9NSA0	Positive
P26640	Positive
P59796	Positive
O95298	Positive
P48551	Positive
Q9NS85	Positive
P00338	Positive
Q92952	Positive
Q16322	Positive
P50747	Positive
P43005	Positive
P22460	Positive
P20618	Positive
P30038	Positive
Q9Y289	Positive
P22459	Positive
P00439	Positive
P51843	Positive
O00519	Positive
P05546	Positive
O00555	Positive
Q6W5P4	Positive
Q6NS38	Positive
P49721	Positive
P25092	Positive
P08729	Positive
P99999	Positive
P00480	Positive
P23381	Positive
P04746	Positive
Q86Y39	Positive
P14555	Positive
Q9BXJ7	Positive
P23378	Positive
P04629	Positive
Q96LZ3	Positive
P51857	Positive
Q9UGM1	Positive
P37088	Positive
Q14181	Positive
P29803	Positive
Q8WY07	Positive
P24941	Positive
Q13200	Positive
P68371	Positive
P29972	Positive
O43175	Positive
P17735	Positive
P14735	Positive
Q13882	Positive
P31939	Positive
P05981	Positive
O15460	Positive
P14679	Positive
Q9NR19	Positive
O95477	Positive
P07550	Positive
Q99250	Positive
Q9NR33	Positive
P02671	Positive
Q04828	Positive
P10827	Positive
Q16760	Positive
P40394	Positive
P47898	Positive
Q92781	Positive
O75936	Positive
Q13509	Positive
Q9NR96	Positive
P08700	Positive
P50406	Positive
P27797	Positive
Q9H228	Positive
P33151	Positive
P42357	Positive
P51800	Positive
Q9UHC9	Positive
Q8N159	Positive
P16070	Positive
P12314	Positive
P54687	Positive
P39086	Positive
P00750	Positive
P37231	Positive
Q8NER1	Positive
P14770	Positive
Q5XXA6	Positive
P00742	Positive
O00763	Positive
Q99643	Positive
Q9UGM6	Positive
P30531	Positive
P08100	Positive
P19634	Positive
P49069	Positive
Q13183	Positive
O95190	Positive
Q9UIC8	Positive
P01023	Positive
P51580	Positive
P21728	Positive
Q16795	Positive
P18089	Positive
Q15758	Positive
O95139	Positive
Q6IA69	Positive
P21802	Positive
P16389	Positive
P35610	Positive
P10515	Positive
P35368	Positive
O43677	Positive
P26358	Positive
Q14994	Positive
Q12797	Positive
Q16790	Positive
Q9Y345	Positive
Q05932	Positive
P12081	Positive
O15528	Positive
P37288	Positive
Q9Y233	Positive
P01375	Positive
P29218	Positive
Q96NR8	Positive
P35372	Positive
P49591	Positive
P23416	Positive
O43272	Positive
P19838	Positive
P43681	Positive
Q9UK17	Positive
P00505	Positive
P16455	Positive
Q9Y697	Positive
P54289	Positive
P47712	Positive
P02679	Positive
Q969I3	Positive
P23415	Positive
P54886	Positive
Q8WWT9	Positive
Q14123	Positive
Q9Y619	Positive
P23284	Positive
O00469	Positive
P78334	Positive
Q14626	Positive
P35354	Positive
Q8N8R3	Positive
P37059	Positive
O94788	Positive
P03915	Positive
Q8TCT1	Positive
Q9NXG6	Positive
P15538	Positive
P78559	Positive
Q9BY66	Positive
P13674	Positive
O60658	Positive
P18545	Positive
Q99259	Positive
Q99624	Positive
Q8N5Z0	Positive
P06737	Positive
P01189	Positive
P51512	Positive
P45877	Positive
P11362	Positive
P10826	Positive
P34972	Positive
P07864	Positive
Q08493	Positive
Q9UK23	Positive
P06126	Positive
P08709	Positive
P49588	Positive
P23743	Positive
P22102	Positive
O00341	Positive
Q9Y666	Positive
Q13547	Positive
P54750	Positive
O75908	Positive
P04229	Positive
O60494	Positive
P04054	Positive
Q6YP21	Positive
P01133	Positive
P08173	Positive
P21817	Positive
Q13956	Positive
O75330	Positive
P30838	Positive
P08912	Positive
P28074	Positive
Q71U36	Positive
P11926	Positive
Q9BW92	Positive
P12931	Positive
Q16558	Positive
P23368	Positive
P36507	Positive
Q07075	Positive
Q9GZZ6	Positive
Q92769	Positive
P08514	Positive
P00748	Positive
P14625	Positive
P14778	Positive
Q13427	Positive
P25024	Positive
O15239	Positive
P05771	Positive
Q9Y2U5	Positive
P34949	Positive
P00747	Positive
P51692	Positive
P00533	Positive
P14867	Positive
P05141	Positive
P28223	Positive
O14561	Positive
P12277	Positive
Q9NXE4	Positive
P02675	Positive
P32238	Positive
P40261	Positive
Q99884	Positive
Q9NS75	Positive
P31358	Positive
P46439	Positive
Q9GZR5	Positive
P63316	Positive
P08246	Positive
O14521	Positive
P18405	Positive
P11473	Positive
P23921	Positive
Q16775	Positive
Q9BTZ2	Positive
O00764	Positive
P23141	Positive
P11678	Positive
Q9P0Z9	Positive
P48039	Positive
Q9H2M3	Positive
P10646	Positive
O95167	Positive
Q9HA77	Positive
P04424	Positive
P04083	Positive
P42574	Positive
P22455	Positive
P32418	Positive
Q96RD7	Positive
P20815	Positive
Q06278	Positive
O14788	Positive
P17752	Positive
P27815	Positive
P36544	Positive
Q9UJT1	Positive
P31327	Positive
P21964	Positive
Q96I59	Positive
P31040	Positive
P56696	Positive
Q13085	Positive
P08183	Positive
P04156	Positive
O14649	Positive
P25103	Positive
P11168	Positive
P30049	Positive
P55157	Positive
P47901	Positive
Q9NYK1	Positive
P35968	Positive
Q7L3T8	Positive
P34995	Positive
Q15842	Positive
O15399	Positive
Q15274	Positive
P55809	Positive
P31644	Positive
P43115	Positive
Q8N119	Positive
P27695	Positive
P78362	Positive
Q99519	Positive
P16471	Positive
P19235	Positive
P22748	Positive
Q07869	Positive
A8MPY1	Positive
P15121	Positive
Q02641	Positive
P07900	Positive
Q6PI48	Positive
P78417	Positive
O43676	Positive
P11177	Positive
P08254	Positive
P05231	Positive
O60909	Positive
P04035	Positive
P55017	Positive
Q9UMX2	Positive
P53985	Positive
P22303	Positive
Q7Z2W7	Positive
P10721	Positive
P17302	Positive
Q13698	Positive
Q8IWT1	Positive
P52788	Positive
P21918	Positive
O60513	Positive
P02794	Positive
Q9NZK7	Positive
P42898	Positive
Q9NY59	Positive
Q02218	Positive
Q9BQB6	Positive
Q9H306	Positive
O14717	Positive
P11836	Positive
P29317	Positive
P05230	Positive
P02787	Positive
P17174	Positive
Q6IB77	Positive
O95180	Positive
P03886	Positive
P45844	Positive
Q8WTV0	Positive
Q9ULA0	Positive
P23219	Positive
P20711	Positive
Q14330	Positive
P41594	Positive
P14618	Positive
P40306	Positive
O15379	Positive
Q05901	Positive
P52895	Positive
P34903	Positive
P51649	Positive
P27361	Positive
P17181	Positive
O75380	Positive
P49286	Positive
P48506	Positive
Q16515	Positive
P48051	Positive
P02818	Positive
O95907	Positive
Q8IYQ7	Positive
P30405	Positive
Q03181	Positive
O15403	Positive
Q14957	Positive
P12236	Positive
O14556	Positive
Q8TCU5	Positive
Q03154	Positive
P28702	Positive
P25100	Positive
Q05586	Positive
Q9BVG9	Positive
P35218	Positive
P49773	Positive
Q08345	Positive
Q9NYR8	Positive
Q13630	Positive
Q00266	Positive
P16860	Positive
P35869	Positive
P51788	Positive
P22891	Positive
P43088	Positive
O76054	Positive
P48167	Positive
Q8N1Q1	Positive
P18825	Positive
Q7L0J3	Positive
Q05329	Positive
Q9H598	Positive
Q14524	Positive
O60669	Positive
Q92731	Positive
Q9ULX7	Positive
P11274	Positive
Q04609	Positive
P08620	Positive
Q92506	Positive
P07947	Positive
P11229	Positive
P47895	Positive
P33402	Positive
Q9NSA2	Positive
P48029	Positive
P05362	Positive
O95169	Positive
P11137	Positive
P09884	Positive
Q9GZT4	Positive
P14207	Positive
O00305	Positive
P11498	Positive
Q9UJS0	Positive
Q9GZT9	Positive
P20138	Positive
P05113	Positive
P48651	Positive
P22033	Positive
O60931	Positive
O75493	Positive
P42685	Positive
O00180	Positive
P43119	Positive
P28331	Positive
P43007	Positive
Q9UBK8	Positive
Q00653	Positive
Q02809	Positive
P46597	Positive
P18031	Positive
P31213	Positive
Q15759	Positive
Q6ZMR3	Positive
Q9ULW8	Positive
Q16878	Positive
P08069	Positive
P32754	Positive
P59768	Positive
P19801	Positive
P49895	Positive
Q13258	Positive
Q13224	Positive
P54284	Positive
O60488	Positive
Q9HCC0	Positive
P10635	Positive
Q99456	Positive
Q9HAB3	Positive
Q96DP5	Positive
O43766	Positive
P01579	Positive
O43772	Positive
Q9NWM0	Positive
O14756	Positive
Q12791	Positive
Q8NET8	Positive
P27708	Positive
O76074	Positive
Q99808	Positive
P30556	Positive
Q9Y478	Positive
P20594	Positive
O75911	Positive
P55263	Positive
O15111	Positive
P28222	Positive
P15692	Positive
Q9UKV0	Positive
Q9NY72	Positive
P30837	Positive
P01031	Positive
Q14353	Positive
P49821	Positive
P35499	Positive
Q12879	Positive
P08319	Positive
P49189	Positive
Q05655	Positive
Q9Y2Q0	Positive
O94903	Positive
Q16620	Positive
P09172	Positive
P15428	Positive
P23786	Positive
O95178	Positive
O43674	Positive
Q96SW2	Positive
P62942	Positive
P42081	Positive
O95168	Positive
O94956	Positive
O95182	Positive
P40198	Positive
Q9UDX3	Positive
O75879	Positive
P45452	Positive
P11511	Positive
Q4U2R8	Positive
Q9HBH1	Positive
P27338	Positive
Q8N142	Positive
P80365	Positive
Q9UI09	Positive
P38484	Positive
P42330	Positive
P32297	Positive
Q9NS18	Positive
P04406	Positive
Q8TET4	Positive
P11230	Positive
P08581	Positive
P07327	Positive
P51172	Positive
P06858	Positive
Q8IVH4	Positive
P16083	Positive
Q96RJ0	Positive
O14764	Positive
Q14571	Positive
O60701	Positive
P22413	Positive
P21796	Positive
P05106	Positive
P28472	Positive
P08172	Positive
P12821	Positive
P40763	Positive
P03891	Positive
P21731	Positive
P98164	Positive
P15144	Positive
P55011	Positive
Q13126	Positive
Q6NUM9	Positive
P39900	Positive
P23258	Positive
P09417	Positive
P20273	Positive
P03923	Positive
P13612	Positive
Q9Y257	Positive
O95573	Positive
P05166	Positive
O14732	Positive
P62508	Positive
P49888	Positive
P15382	Positive
O43451	Positive
P11766	Positive
P08253	Positive
Q9BYF1	Positive
Q9NPF7	Positive
P00326	Positive
O60882	Positive
P00367	Positive
P23975	Positive
Q09470	Positive
Q99735	Positive
P50416	Positive
Q08828	Positive
Q13946	Positive
O75899	Positive
P78540	Positive
P68871	Positive
P25021	Positive
P53582	Positive
P35228	Positive
P36969	Positive
Q9UG56	Positive
Q02928	Positive
P14061	Positive
Q9UN76	Positive
O00483	Positive
P51553	Positive
Q9Y277	Positive
P49915	Positive
P09467	Positive
P10912	Positive
Q14697	Positive
Q9HBH5	Positive
P24298	Positive
O14841	Positive
O14920	Positive
Q9UM07	Positive
P02768	Positive
P34897	Positive
O95665	Positive
P30519	Positive
Q9NRX3	Positive
Q9NRF9	Positive
P78508	Positive
P30613	Positive
P08887	Positive
P34896	Positive
O60656	Positive
Q96C36	Positive
Q99928	Positive
P07202	Positive
P20648	Positive
P04040	Positive
P05089	Positive
P38435	Positive
P21281	Positive
P39023	Positive
P15056	Positive
Q12809	Positive
Q99584	Positive
Q9Y5Y4	Positive
O43708	Positive
P28845	Positive
Q14643	Positive
P31937	Positive
O75907	Positive
P49327	Positive
P08913	Positive
P02708	Positive
P07101	Positive
P43155	Positive
P42345	Positive
Q08499	Positive
P30968	Positive
Q9HCR9	Positive
P10768	Positive
P48728	Positive
P04150	Positive
P17252	Positive
Q16832	Positive
Q8NBN7	Positive
P35520	Positive
Q96HD9	Positive
Q16568	Positive
P48549	Positive
P16444	Positive
P23763	Positive
Q02763	Positive
P35754	Positive
P45381	Positive
Q16739	Positive
O14939	Positive
P23945	Positive
P80404	Positive
Q8IZS8	Positive
P24557	Positive
P07204	Positive
Q04844	Positive
Q9NSD9	Positive
P27986	Positive
P29474	Positive
O95263	Positive
Q9H244	Positive
P42262	Positive
Q92953	Positive
Q9ULZ9	Positive
P20061	Positive
P48061	Positive
P47872	Positive
Q5JPH6	Positive
Q16798	Positive
Q96KS0	Positive
Q9P0J0	Positive
Q99707	Positive
P00734	Positive
Q9UBN7	Positive
Q02252	Positive
Q9NRE1	Positive
P24347	Positive
P26447	Positive
P15104	Positive
Q01668	Positive
P48169	Positive
Q02127	Positive
Q96SL4	Positive
P13866	Positive
P31749	Positive
P37023	Positive
P12268	Positive
Q9UJT0	Positive
P10253	Positive
P54219	Positive
Q15413	Positive
P47869	Positive
P10275	Positive
P06746	Positive
P56282	Positive
Q9NUB1	Positive
P07814	Positive
Q14145	Positive
Q7RTV2	Positive
Q15031	Positive
Q96A70	Positive
Q02643	Positive
O15554	Positive
P07998	Positive
P09848	Positive
P32322	Positive
Q96RI1	Positive
Q9UPY5	Positive
Q8TDS4	Positive
Q01064	Positive
P63027	Positive
P05023	Positive
Q07912	Positive
O95237	Positive
P40925	Positive
P05093	Positive
P12532	Positive
P17568	Positive
P00813	Positive
O43525	Positive
Q15825	Positive
Q16853	Positive
Q9H6Z9	Positive
P41250	Positive
Q07343	Positive
Q02153	Positive
Q9P2J5	Positive
Q96EY8	Positive
P62158	Positive
O60391	Positive
P33765	Positive
P24752	Positive
O60733	Positive
P05186	Positive
Q9H2X9	Positive
O14842	Positive
Q9Y691	Positive
Q04771	Positive
P21695	Positive
P30518	Positive
P45880	Positive
P51681	Positive
P35916	Positive
Q13621	Positive
P30988	Positive
O75438	Positive
P51659	Positive
Q969P6	Positive
Q00796	Positive
Q9UN88	Positive
P00915	Positive
O75306	Positive
P69905	Positive
Q15046	Positive
Q99835	Positive
Q9UGH3	Positive
O00591	Positive
P20132	Positive
P61073	Positive
Q9UHI7	Positive
P22234	Positive
Q9H4B7	Positive
Q9Y5R2	Positive
Q9NVH6	Positive
P23469	Positive
O75746	Positive
O95749	Positive
Q99062	Positive
Q9Y6M9	Positive
Q9P2R7	Positive
Q07001	Positive
O43741	Positive
P14324	Positive
P01130	Positive
Q9NZV8	Positive
O95479	Positive
Q9UGI6	Positive
P03372	Positive
P48067	Positive
Q9NSE4	Positive
Q14721	Positive
P31645	Positive
P54368	Positive
Q9Y2D0	Positive
Q8IVL6	Positive
P12235	Positive
O14880	Positive
Q96RQ3	Positive
P49902	Positive
O14832	Positive
P23297	Positive
P53667	Positive
Q14416	Positive
Q8TED1	Positive
P48507	Positive
P07203	Positive
O60568	Positive
O75900	Positive
P48664	Positive
P49585	Positive
P36888	Positive
Q16873	Positive
P26639	Positive
P29034	Positive
P14060	Positive
Q9H169	Positive
Q9BYZ2	Positive
O15374	Positive
Q8IUZ5	Positive
P21549	Positive
O43424	Positive
P00325	Positive
P56556	Positive
Q7L266	Positive
P07741	Positive
P09488	Positive
O95299	Positive
O43447	Positive
P35408	Positive
P22352	Positive
P30874	Positive
Q9P0X4	Positive
Q8N1C3	Positive
P00491	Positive
P10828	Positive
Q9Y600	Positive
Q14003	Positive
P32239	Positive
O95954	Positive
P12319	Positive
Q13002	Positive
P04070	Positive
P30536	Positive
Q9BYV1	Positive
P24530	Positive
P35498	Positive
P28161	Positive
Q99542	Positive
P12104	Positive
Q92523	Positive
P21554	Positive
P13569	Positive
P11309	Positive
O15269	Positive
Q9NYX4	Positive
P19021	Positive
P22557	Positive
P21462	Positive
P52569	Positive
P51787	Positive
Q92887	Positive
Q16881	Positive
P21912	Positive
Q13003	Positive
O75762	Positive
P01009	Positive
P17812	Positive
Q9Y2J8	Positive
Q9H252	Positive
P20309	Positive
P30711	Positive
O43497	Positive
P08631	Positive
Q9NXA8	Positive
P27707	Positive
P14410	Positive
P17658	Positive
Q9ULK0	Positive
P41145	Positive
P23458	Positive
P78352	Positive
Q13255	Positive
P61278	Positive
P03956	Positive
Q99714	Positive
P46098	Positive
P00749	Positive
O60706	Positive
P14868	Positive
P08235	Positive
Q8N543	Positive
Q01718	Positive
Q53H96	Positive
Q8IVL5	Positive
O43681	Positive
P17516	Positive
Q9NS40	Positive
Q5JTZ9	Positive
Q07864	Positive
P19404	Positive
O95881	Positive
P29274	Positive
P49619	Positive
P40189	Positive
Q16719	Positive
P00492	Positive
P06239	Positive
P60880	Positive
O15427	Positive
P56937	Positive
P00374	Positive
Q9UBM7	Positive
Q16836	Positive
P36021	Positive
Q8NG66	Positive
P50440	Positive
Q9Y646	Positive
Q9H2S1	Positive
Q9UP95	Positive
P28566	Positive
P18505	Positive
P42263	Positive
P28221	Positive
Q14432	Positive
Q9NR97	Positive
P42261	Positive
P49841	Positive
P48544	Positive
P49916	Positive
P27169	Positive
P16234	Positive
P01100	Positive
Q03013	Positive
P30825	Positive
P05165	Positive
Q9UHI5	Positive
Q8N8N7	Positive
P07437	Positive
P01584	Positive
Q9NY47	Positive
Q02338	Positive
P30044	Positive
P48163	Positive
P15559	Positive
Q09428	Positive
P56181	Positive
P00390	Positive
P82251	Positive
Q9NPC2	Positive
Q15858	Positive
P10696	Positive
Q14832	Positive
Q5TDP6	Positive
Q9Y2I1	Positive
P13716	Positive
P06276	Positive
P48048	Positive
P05107	Positive
Q13131	Positive
P51511	Positive
P16220	Positive
Q9Y5Y9	Positive
P17405	Positive
P41231	Positive
P06310	Positive
P31350	Positive
Q16445	Positive
P52209	Positive
P21917	Positive
P03901	Positive
Q8TCC7	Positive
Q8NFA2	Positive
Q9Y2Z4	Positive
Q13393	Positive
P13995	Positive
P24385	Positive
P00352	Positive
Q8TD30	Positive
Q14749	Positive
P14416	Positive
P00918	Positive
P54710	Positive
P16066	Positive
P00797	Positive
Q14032	Positive
O95069	Positive
Q9Y2Q3	Positive
O96000	Positive
P57059	Positive
P48058	Positive
O00459	Positive
Q9BY41	Positive
Q9UDR5	Positive
Q02880	Positive
P15291	Positive
P19793	Positive
Q9UM73	Positive
P09211	Positive
Q14573	Positive
P68366	Positive
P49448	Positive
P23280	Positive
P00451	Positive
P80511	Positive
P15260	Positive
P19113	Positive
P62714	Positive
P11586	Positive
Q9H3N8	Positive
P49419	Positive
Q9H239	Positive
P37058	Positive
Q16647	Positive
P09237	Positive
P20701	Positive
O60427	Positive
P27487	Positive
Q9H3S4	Positive
Q15822	Positive
P05091	Positive
Q9UQQ2	Positive
Q02817	Positive
Q13564	Positive
Q9NY46	Positive
P07510	Positive
P30926	Positive
P50135	Positive
P16233	Positive
P47871	Positive
P09038	Positive
Q9Y5K3	Positive
Q16671	Positive
P29466	Positive
O60674	Positive
Q07837	Positive
P17787	Positive
P10415	Positive
Q92736	Positive
P07949	Positive
Q96P88	Positive
P18283	Positive
Q9H015	Positive
P48547	Positive
Q96EM0	Positive
P30532	Positive
Q32P28	Positive
O43181	Positive
P10276	Positive
P47870	Positive
P33121	Positive
Q8WU03	Positive
P07098	Positive
P31153	Positive
P07225	Positive
P28476	Positive
Q7Z2H8	Positive
Q07699	Positive
P49146	Positive
P16219	Positive
Q15800	Positive
Q99720	Positive
P17948	Positive
O95363	Positive
P18507	Positive
Q06432	Positive
P17707	Positive
Q8NFJ5	Positive
Q04760	Positive
P40939	Positive
P07451	Positive
P14780	Positive
Q9BXA5	Positive
O14727	Positive
Q13332	Positive
Q9Y3R4	Positive
P51168	Positive
P41143	Positive
P04271	Positive
P25815	Positive
P48637	Positive
O15270	Positive
P62937	Positive
P40926	Positive
P36896	Positive
P07948	Positive
Q14534	Positive
P41595	Positive
Q96RP8	Positive
P13945	Positive
O43920	Positive
P30043	Positive
P51648	Positive
Q16772	Positive
P12318	Positive
Q9UKG9	Positive
P51606	Positive
P11387	Positive
P35219	Positive
P54577	Positive
P09619	Positive
P30520	Positive
P07195	Positive
O00222	Positive
Q06203	Positive
P10109	Positive
P08684	Positive
P32745	Positive
P35348	Positive
P06732	Positive
P04626	Positive
Q9UHW9	Positive
Q14654	Positive
O43678	Positive
P03897	Positive
P31639	Positive
Q03431	Positive
P50579	Positive
Q9UI32	Positive
Q15617	Unlabelled
Q8IVW8	Unlabelled
Q9UK12	Unlabelled
Q53TS8	Unlabelled
Q96EH8	Unlabelled
O75976	Unlabelled
Q9UMZ3	Unlabelled
A8MPV3	Unlabelled
P62879	Unlabelled
P32298	Unlabelled
P48740	Unlabelled
Q6ZU69	Unlabelled
Q96JQ0	Unlabelled
Q8IUH5	Unlabelled
A6NF34	Unlabelled
Q7RTV0	Unlabelled
Q96JI7	Unlabelled
Q16378	Unlabelled
Q9HBT7	Unlabelled
Q8NB90	Unlabelled
Q8NI37	Unlabelled
Q96RN5	Unlabelled
Q9BZ01	Unlabelled
Q8WXI7	Unlabelled
P11474	Unlabelled
Q8N4Y2	Unlabelled
Q12834	Unlabelled
O14734	Unlabelled
Q96C45	Unlabelled
Q6ZN18	Unlabelled
Q5VX71	Unlabelled
E2RYF6	Unlabelled
Q4LDG9	Unlabelled
Q5K4L6	Unlabelled
Q7Z2Y5	Unlabelled
Q6UXD5	Unlabelled
Q9BV29	Unlabelled
P61244	Unlabelled
Q8WZ73	Unlabelled
O75051	Unlabelled
Q96FZ5	Unlabelled
Q8N8V4	Unlabelled
Q9BYD5	Unlabelled
A6NMY6	Unlabelled
Q96KN1	Unlabelled
P41091	Unlabelled
Q6UY18	Unlabelled
P51513	Unlabelled
Q8WY64	Unlabelled
P84022	Unlabelled
Q53RY4	Unlabelled
Q9BT04	Unlabelled
Q8IWF7	Unlabelled
Q8TB73	Unlabelled
P07384	Unlabelled
Q14C87	Unlabelled
Q8NHG8	Unlabelled
Q8TDN2	Unlabelled
P63167	Unlabelled
O95528	Unlabelled
P12111	Unlabelled
Q13651	Unlabelled
Q9Y566	Unlabelled
Q9H147	Unlabelled
Q9HCK0	Unlabelled
Q14315	Unlabelled
P01892	Unlabelled
P36402	Unlabelled
Q3LI66	Unlabelled
Q9NUY8	Unlabelled
A6NH11	Unlabelled
Q6UX73	Unlabelled
Q9NR20	Unlabelled
P10243	Unlabelled
Q9ULM0	Unlabelled
P60370	Unlabelled
Q5TEZ5	Unlabelled
Q9BZD4	Unlabelled
O15156	Unlabelled
A6NJG2	Unlabelled
Q86WZ6	Unlabelled
Q15797	Unlabelled
Q9H7N4	Unlabelled
Q5JSJ4	Unlabelled
Q86UR5	Unlabelled
Q9P215	Unlabelled
Q8N715	Unlabelled
Q13422	Unlabelled
O75564	Unlabelled
Q2KHR3	Unlabelled
Q96NX9	Unlabelled
Q96MF4	Unlabelled
Q6RUI8	Unlabelled
Q8IZP9	Unlabelled
Q9H1M4	Unlabelled
Q8IUD6	Unlabelled
O75947	Unlabelled
P36406	Unlabelled
P10645	Unlabelled
Q6IPT2	Unlabelled
Q14449	Unlabelled
Q9BSK0	Unlabelled
P11509	Unlabelled
O15055	Unlabelled
P49023	Unlabelled
P02730	Unlabelled
Q96G30	Unlabelled
Q9UMS6	Unlabelled
Q96I36	Unlabelled
Q00059	Unlabelled
A2RUB1	Unlabelled
Q96FW1	Unlabelled
P63162	Unlabelled
Q9UND3	Unlabelled
Q6UXQ4	Unlabelled
O43324	Unlabelled
Q96MW1	Unlabelled
Q9Y5W9	Unlabelled
O43194	Unlabelled
Q8NBR6	Unlabelled
Q2VYF4	Unlabelled
Q9UBB4	Unlabelled
E5RJ46	Unlabelled
Q99081	Unlabelled
Q14520	Unlabelled
Q9NWW5	Unlabelled
Q5TZA2	Unlabelled
P22083	Unlabelled
Q8NE01	Unlabelled
A4QPH2	Unlabelled
Q9Y5F1	Unlabelled
Q96D05	Unlabelled
O60333	Unlabelled
Q9NRX6	Unlabelled
P56178	Unlabelled
Q14681	Unlabelled
P31941	Unlabelled
O75223	Unlabelled
P15085	Unlabelled
O95807	Unlabelled
Q9H089	Unlabelled
A8MV57	Unlabelled
Q2M238	Unlabelled
Q5JRS4	Unlabelled
Q86WA8	Unlabelled
Q9NTM9	Unlabelled
P42858	Unlabelled
Q9BU19	Unlabelled
Q9Y2E8	Unlabelled
Q92537	Unlabelled
Q13347	Unlabelled
Q9BYP7	Unlabelled
Q8NEY1	Unlabelled
O60664	Unlabelled
O15172	Unlabelled
O00264	Unlabelled
Q6ZW13	Unlabelled
Q92673	Unlabelled
Q9NQ38	Unlabelled
O43559	Unlabelled
Q9BWL3	Unlabelled
Q96F10	Unlabelled
Q96PQ0	Unlabelled
P01148	Unlabelled
P04839	Unlabelled
A0AV02	Unlabelled
Q8N109	Unlabelled
Q0D2K3	Unlabelled
Q4G176	Unlabelled
P02489	Unlabelled
Q9NWD9	Unlabelled
O94868	Unlabelled
Q9Y328	Unlabelled
O43529	Unlabelled
P09430	Unlabelled
Q96BP2	Unlabelled
Q9Y6X9	Unlabelled
Q96EK2	Unlabelled
Q6PCB5	Unlabelled
P05455	Unlabelled
Q9NY25	Unlabelled
Q6Q788	Unlabelled
Q9NWF9	Unlabelled
Q9NU53	Unlabelled
P80192	Unlabelled
Q96EZ4	Unlabelled
O75970	Unlabelled
Q3ZCQ8	Unlabelled
Q01524	Unlabelled
Q96D21	Unlabelled
Q8NGW1	Unlabelled
Q9UBZ9	Unlabelled
O95166	Unlabelled
A6NCL2	Unlabelled
Q8IZC7	Unlabelled
A8MWK0	Unlabelled
P0C6A0	Unlabelled
Q96R08	Unlabelled
Q9Y5F2	Unlabelled
Q9NX76	Unlabelled
A6NEY8	Unlabelled
Q96CJ1	Unlabelled
Q7Z3Y8	Unlabelled
Q9ULE0	Unlabelled
Q5TID7	Unlabelled
Q9Y3Q8	Unlabelled
Q6NZ36	Unlabelled
P25398	Unlabelled
P03928	Unlabelled
Q9Y2B0	Unlabelled
O95970	Unlabelled
O75698	Unlabelled
Q86UP2	Unlabelled
Q9Y605	Unlabelled
A6NGQ2	Unlabelled
Q96DE9	Unlabelled
O75629	Unlabelled
Q8ND04	Unlabelled
P35713	Unlabelled
Q5VWQ0	Unlabelled
A2RUQ5	Unlabelled
P07910	Unlabelled
Q5JQD4	Unlabelled
Q4G1C9	Unlabelled
Q49AM1	Unlabelled
Q8TD91	Unlabelled
Q96JJ3	Unlabelled
P62888	Unlabelled
Q8N2E6	Unlabelled
Q86UW1	Unlabelled
A6NEH8	Unlabelled
P13639	Unlabelled
Q96HY7	Unlabelled
Q9UGP8	Unlabelled
P25929	Unlabelled
Q8NHX9	Unlabelled
P08603	Unlabelled
Q7Z7K0	Unlabelled
Q12882	Unlabelled
Q9NX47	Unlabelled
O00418	Unlabelled
Q8TBC4	Unlabelled
Q9UHF7	Unlabelled
Q5TH74	Unlabelled
Q6IQ23	Unlabelled
O60259	Unlabelled
Q8IWX8	Unlabelled
Q8TBQ9	Unlabelled
Q8N414	Unlabelled
Q969K7	Unlabelled
Q9BZZ5	Unlabelled
Q9Y651	Unlabelled
Q6ZT77	Unlabelled
Q9HB31	Unlabelled
P40126	Unlabelled
Q9NYA4	Unlabelled
Q9UKP4	Unlabelled
Q5BN46	Unlabelled
Q96S16	Unlabelled
Q9NP71	Unlabelled
O15061	Unlabelled
Q15035	Unlabelled
Q99719	Unlabelled
Q9ULB4	Unlabelled
O43482	Unlabelled
Q8TED4	Unlabelled
Q03936	Unlabelled
P57739	Unlabelled
Q8NCK3	Unlabelled
P0C879	Unlabelled
Q9P1U1	Unlabelled
P26442	Unlabelled
Q9H0L4	Unlabelled
Q12767	Unlabelled
Q8IUE1	Unlabelled
P0CB38	Unlabelled
A6NCC3	Unlabelled
P78347	Unlabelled
A1YPR0	Unlabelled
Q5VY80	Unlabelled
O14511	Unlabelled
A6NM15	Unlabelled
Q14686	Unlabelled
Q9UPS6	Unlabelled
Q9H172	Unlabelled
O75845	Unlabelled
P13646	Unlabelled
Q6NTE8	Unlabelled
O60469	Unlabelled
P82933	Unlabelled
P60983	Unlabelled
Q96KK5	Unlabelled
P49848	Unlabelled
Q6ZU82	Unlabelled
Q8WUG5	Unlabelled
Q86YT6	Unlabelled
Q86U17	Unlabelled
Q8WVZ1	Unlabelled
Q96QR8	Unlabelled
Q9Y6Q6	Unlabelled
Q96GI7	Unlabelled
Q9Y2H0	Unlabelled
Q9H081	Unlabelled
P26717	Unlabelled
Q5FYA8	Unlabelled
Q6A162	Unlabelled
P22676	Unlabelled
Q9Y216	Unlabelled
O75844	Unlabelled
Q9UKT9	Unlabelled
O14657	Unlabelled
Q05823	Unlabelled
Q9H903	Unlabelled
Q96N28	Unlabelled
Q53GT1	Unlabelled
Q8NGL3	Unlabelled
Q2M3W8	Unlabelled
O60279	Unlabelled
Q0VD67	Unlabelled
Q6UX06	Unlabelled
Q9H3M7	Unlabelled
Q9H5J0	Unlabelled
Q9H1Z4	Unlabelled
Q75VX8	Unlabelled
P46952	Unlabelled
Q7Z713	Unlabelled
Q01814	Unlabelled
Q9BQE5	Unlabelled
Q9Y6H1	Unlabelled
Q9P291	Unlabelled
Q96N76	Unlabelled
Q9H115	Unlabelled
Q8IXL9	Unlabelled
Q9P2D8	Unlabelled
Q8N2E2	Unlabelled
P47736	Unlabelled
Q96EI5	Unlabelled
Q58EX2	Unlabelled
Q9UKV3	Unlabelled
Q5T752	Unlabelled
Q8NB37	Unlabelled
Q8IV08	Unlabelled
Q6ZTI0	Unlabelled
Q9NUQ9	Unlabelled
Q8N6T0	Unlabelled
Q502X0	Unlabelled
Q9BRK5	Unlabelled
Q9H3T2	Unlabelled
Q9NXR5	Unlabelled
O95292	Unlabelled
P02753	Unlabelled
Q9UIL8	Unlabelled
Q75NE6	Unlabelled
Q66GS9	Unlabelled
Q8IY37	Unlabelled
Q8WYL5	Unlabelled
P05496	Unlabelled
Q9P0L0	Unlabelled
Q9UQB3	Unlabelled
Q9BYC8	Unlabelled
Q7L622	Unlabelled
P0CG47	Unlabelled
Q8ND83	Unlabelled
Q14D04	Unlabelled
Q9UHM6	Unlabelled
Q16617	Unlabelled
Q16851	Unlabelled
Q6WN34	Unlabelled
Q6P4D5	Unlabelled
Q86XA0	Unlabelled
Q96MT0	Unlabelled
Q8WY50	Unlabelled
P61129	Unlabelled
O95867	Unlabelled
Q8TC90	Unlabelled
Q5VZR2	Unlabelled
Q9HCJ0	Unlabelled
Q9HD15	Unlabelled
Q8NGN8	Unlabelled
A8MV24	Unlabelled
Q96EB1	Unlabelled
Q9H0M5	Unlabelled
Q96DA6	Unlabelled
Q96MK2	Unlabelled
P25788	Unlabelled
Q96QA5	Unlabelled
Q9BTV6	Unlabelled
A6NGR9	Unlabelled
O60832	Unlabelled
Q9UNZ2	Unlabelled
Q9Y5M8	Unlabelled
Q6XPR3	Unlabelled
Q9C040	Unlabelled
P55083	Unlabelled
Q5JTD7	Unlabelled
Q13133	Unlabelled
Q6QEF8	Unlabelled
Q4V348	Unlabelled
O75914	Unlabelled
Q96NT5	Unlabelled
Q99788	Unlabelled
Q96P47	Unlabelled
P35244	Unlabelled
Q96G01	Unlabelled
Q9HBW0	Unlabelled
A0PJE2	Unlabelled
Q8IVE0	Unlabelled
Q6PL45	Unlabelled
Q9NS84	Unlabelled
Q14562	Unlabelled
Q15560	Unlabelled
Q96L12	Unlabelled
Q9BWJ2	Unlabelled
O60890	Unlabelled
O95149	Unlabelled
Q8N8J6	Unlabelled
Q8NDA2	Unlabelled
Q8N7H1	Unlabelled
A2A2Z9	Unlabelled
P52739	Unlabelled
P0CF74	Unlabelled
Q9BQI6	Unlabelled
Q9H8T0	Unlabelled
A2VDJ0	Unlabelled
O00507	Unlabelled
Q13402	Unlabelled
Q969V4	Unlabelled
Q8WZ92	Unlabelled
P54849	Unlabelled
Q9NRL2	Unlabelled
Q86UU5	Unlabelled
Q16774	Unlabelled
Q8N1T3	Unlabelled
C9JUS6	Unlabelled
Q8WYN3	Unlabelled
Q9BQC6	Unlabelled
Q8NGJ8	Unlabelled
Q9C0E8	Unlabelled
O75381	Unlabelled
P33991	Unlabelled
Q9Y2T1	Unlabelled
Q16082	Unlabelled
Q9Y2P4	Unlabelled
A6NFU8	Unlabelled
P0CL82	Unlabelled
Q9H1K1	Unlabelled
Q96AW1	Unlabelled
Q9UJD0	Unlabelled
Q9H4L4	Unlabelled
Q99697	Unlabelled
Q14210	Unlabelled
A6NH21	Unlabelled
O75074	Unlabelled
Q8IXA5	Unlabelled
O94906	Unlabelled
Q16626	Unlabelled
Q9NY65	Unlabelled
O43264	Unlabelled
Q9HBY0	Unlabelled
Q8N131	Unlabelled
Q5JTY5	Unlabelled
Q6NVY1	Unlabelled
Q9NUM4	Unlabelled
P55289	Unlabelled
Q9BPX7	Unlabelled
Q9NQX0	Unlabelled
Q8N3Z0	Unlabelled
Q8IZ21	Unlabelled
O95997	Unlabelled
Q6ZUM4	Unlabelled
Q14703	Unlabelled
Q99967	Unlabelled
Q9BW71	Unlabelled
Q6L8H4	Unlabelled
Q6P2P2	Unlabelled
Q96T88	Unlabelled
Q9H336	Unlabelled
Q96B26	Unlabelled
Q92793	Unlabelled
P61579	Unlabelled
Q86X27	Unlabelled
Q9NWQ4	Unlabelled
P11413	Unlabelled
Q9BSI4	Unlabelled
Q15768	Unlabelled
Q6ZV70	Unlabelled
Q16540	Unlabelled
Q5EE01	Unlabelled
Q7LDG7	Unlabelled
Q9NVG8	Unlabelled
Q52WX2	Unlabelled
P06734	Unlabelled
Q9BQE4	Unlabelled
Q5H943	Unlabelled
Q8NI35	Unlabelled
Q9UGI9	Unlabelled
Q9NS68	Unlabelled
Q9H3E2	Unlabelled
P35900	Unlabelled
Q5H9K5	Unlabelled
P12980	Unlabelled
Q96FL8	Unlabelled
Q96ID5	Unlabelled
Q9UBX1	Unlabelled
Q96RQ9	Unlabelled
Q6ZQQ6	Unlabelled
Q12824	Unlabelled
Q13489	Unlabelled
Q96HG1	Unlabelled
Q9NTJ3	Unlabelled
Q495Y7	Unlabelled
Q8WYR1	Unlabelled
O60238	Unlabelled
Q8IX21	Unlabelled
Q8N1G4	Unlabelled
Q8NGL6	Unlabelled
P25116	Unlabelled
Q8N9W7	Unlabelled
Q6XE38	Unlabelled
Q9NUX5	Unlabelled
Q8TCG2	Unlabelled
Q9UGB4	Unlabelled
Q9UFG5	Unlabelled
Q96FS4	Unlabelled
Q9H295	Unlabelled
Q6NUS8	Unlabelled
Q9H4Z3	Unlabelled
Q9UIF9	Unlabelled
Q2TAL5	Unlabelled
Q9BRX9	Unlabelled
A8MXY4	Unlabelled
O75394	Unlabelled
Q96PP4	Unlabelled
Q6P6B7	Unlabelled
Q8NGP6	Unlabelled
Q9H8Y8	Unlabelled
P0CV99	Unlabelled
Q7Z5L3	Unlabelled
Q96L93	Unlabelled
Q16698	Unlabelled
Q96KX1	Unlabelled
Q4G0N0	Unlabelled
P05015	Unlabelled
A4D0T7	Unlabelled
Q15007	Unlabelled
Q9NXD2	Unlabelled
P20337	Unlabelled
P98198	Unlabelled
Q8WUF5	Unlabelled
Q71RF5	Unlabelled
Q8N8U3	Unlabelled
Q674R7	Unlabelled
Q8N6D5	Unlabelled
Q96EK6	Unlabelled
Q8TBF8	Unlabelled
P40222	Unlabelled
P83881	Unlabelled
P52294	Unlabelled
Q6NZY4	Unlabelled
Q8IZJ4	Unlabelled
Q8WVB3	Unlabelled
Q9NP61	Unlabelled
Q8WZ19	Unlabelled
Q9NQS1	Unlabelled
O43422	Unlabelled
A6H8Z2	Unlabelled
Q92563	Unlabelled
P01275	Unlabelled
Q8N5I4	Unlabelled
Q3KRB8	Unlabelled
Q9Y2X9	Unlabelled
Q8IXP5	Unlabelled
O15446	Unlabelled
Q7Z6J8	Unlabelled
Q9HCG1	Unlabelled
Q8NHV4	Unlabelled
P80748	Unlabelled
Q969Q4	Unlabelled
Q96GF1	Unlabelled
Q8NC26	Unlabelled
P01034	Unlabelled
Q8WZA8	Unlabelled
Q15032	Unlabelled
P57052	Unlabelled
Q8NHP1	Unlabelled
Q96PD5	Unlabelled
P52746	Unlabelled
Q9P265	Unlabelled
P24278	Unlabelled
P04278	Unlabelled
Q9BTD3	Unlabelled
Q99665	Unlabelled
Q8NEF3	Unlabelled
Q9UHP7	Unlabelled
Q9H6R0	Unlabelled
P54920	Unlabelled
Q9NQH7	Unlabelled
Q96EU7	Unlabelled
Q96MF7	Unlabelled
P21926	Unlabelled
P57103	Unlabelled
Q8NGV0	Unlabelled
A0FGR8	Unlabelled
Q9BTM9	Unlabelled
A6NHL2	Unlabelled
Q14995	Unlabelled
Q16585	Unlabelled
Q92530	Unlabelled
O15354	Unlabelled
Q96BH3	Unlabelled
P62324	Unlabelled
A6NCF6	Unlabelled
Q9BRP0	Unlabelled
P0CL84	Unlabelled
Q15735	Unlabelled
Q96S86	Unlabelled
Q86X02	Unlabelled
Q5TIA1	Unlabelled
Q5JRK9	Unlabelled
Q96BD8	Unlabelled
A2RUR9	Unlabelled
Q9UK99	Unlabelled
Q9UKF2	Unlabelled
P98182	Unlabelled
Q9H4I3	Unlabelled
Q15612	Unlabelled
P30511	Unlabelled
Q9UJ71	Unlabelled
Q96PX1	Unlabelled
Q8N0V3	Unlabelled
Q66K66	Unlabelled
Q9GZU3	Unlabelled
O00750	Unlabelled
Q49AA0	Unlabelled
O14974	Unlabelled
O00562	Unlabelled
Q8N4H0	Unlabelled
Q5RGS2	Unlabelled
Q9ULI0	Unlabelled
Q8WXS5	Unlabelled
Q68DU8	Unlabelled
Q96BM9	Unlabelled
Q9Y6G1	Unlabelled
Q9ULV4	Unlabelled
P48145	Unlabelled
P32248	Unlabelled
Q7Z4W2	Unlabelled
Q8NH90	Unlabelled
Q9HCX3	Unlabelled
Q8NHA8	Unlabelled
Q6MZP7	Unlabelled
P35625	Unlabelled
Q86SS6	Unlabelled
Q9P2I0	Unlabelled
Q8IV16	Unlabelled
Q5VV41	Unlabelled
Q9BXQ6	Unlabelled
Q6VMQ6	Unlabelled
Q8IUF1	Unlabelled
Q8IZT8	Unlabelled
Q9NZI6	Unlabelled
Q4AC99	Unlabelled
Q7L8S5	Unlabelled
Q96QP1	Unlabelled
Q8NBP0	Unlabelled
O15522	Unlabelled
Q8N165	Unlabelled
Q8NB50	Unlabelled
Q5FWF7	Unlabelled
Q8IY92	Unlabelled
Q9HB19	Unlabelled
Q32MH5	Unlabelled
Q06830	Unlabelled
Q04118	Unlabelled
Q9NQ39	Unlabelled
P20472	Unlabelled
[truncated: 18,243 more rows]

## Sheet: Cancer
P15260	Positive
P25101	Positive
P69905	Positive
P40198	Positive
P16444	Positive
P01009	Positive
P47871	Positive
Q9UGH3	Positive
P27815	Positive
P30273	Positive
P01008	Positive
P22102	Positive
P35368	Positive
P14778	Positive
Q02763	Positive
P54802	Positive
Q92523	Positive
P11387	Positive
Q9UJT1	Positive
P31327	Positive
Q15759	Positive
P42685	Positive
Q01959	Positive
P48544	Positive
P15121	Positive
P21964	Positive
P54750	Positive
P04629	Positive
P06729	Positive
P17181	Positive
P43119	Positive
Q16739	Positive
P07333	Positive
Q9H4B7	Positive
P56696	Positive
P09917	Positive
Q99460	Positive
P05186	Positive
P50416	Positive
P62508	Positive
P04054	Positive
Q15858	Positive
P23945	Positive
P49286	Positive
P12821	Positive
Q03431	Positive
P23258	Positive
O00767	Positive
P20701	Positive
P26358	Positive
Q08828	Positive
Q92736	Positive
Q14181	Positive
P35498	Positive
P11511	Positive
P37288	Positive
P13716	Positive
Q16850	Positive
P68871	Positive
O95749	Positive
P11926	Positive
P14550	Positive
P35367	Positive
P10275	Positive
P08173	Positive
P25021	Positive
P49916	Positive
P51787	Positive
Q13639	Positive
P24941	Positive
Q99835	Positive
Q9HBH1	Positive
P01375	Positive
Q13200	Positive
P21817	Positive
P47989	Positive
P03886	Positive
P25103	Positive
P09619	Positive
Q9Y5Y9	Positive
Q07869	Positive
P68371	Positive
P51649	Positive
Q9UHC9	Positive
P35372	Positive
P23763	Positive
P00519	Positive
P27338	Positive
Q13936	Positive
O14788	Positive
Q9NYK1	Positive
P22033	Positive
P28074	Positive
P08912	Positive
P41180	Positive
Q13882	Positive
P14735	Positive
P35968	Positive
Q13547	Positive
Q9H244	Positive
P35228	Positive
P31939	Positive
P43220	Positive
P35462	Positive
P10276	Positive
P12931	Positive
P47872	Positive
P23284	Positive
P30559	Positive
Q02127	Positive
P47870	Positive
P04035	Positive
O14646	Positive
P00492	Positive
P28065	Positive
P22607	Positive
P43681	Positive
P14324	Positive
P22303	Positive
P13612	Positive
Q9UK17	Positive
P00734	Positive
P30874	Positive
Q14994	Positive
P53004	Positive
P11142	Positive
P25100	Positive
P14207	Positive
P09884	Positive
P18858	Positive
Q02880	Positive
P07550	Positive
P22888	Positive
P07766	Positive
P10109	Positive
Q9Y271	Positive
P08581	Positive
P28335	Positive
P63027	Positive
P20839	Positive
P30542	Positive
P54289	Positive
P27707	Positive
Q99720	Positive
P00390	Positive
P48443	Positive
P10912	Positive
Q14534	Positive
P31350	Positive
P06858	Positive
Q15413	Positive
P08172	Positive
P43116	Positive
P50052	Positive
Q9NR33	Positive
P00352	Positive
P31749	Positive
Q96PD7	Positive
P41439	Positive
P12319	Positive
Q00975	Positive
P16471	Positive
P03372	Positive
P41145	Positive
P03891	Positive
P19235	Positive
Q8NFJ5	Positive
P02768	Positive
P22830	Positive
P61278	Positive
P14416	Positive
P00374	Positive
P27361	Positive
P10827	Positive
P55017	Positive
Q14571	Positive
O14920	Positive
Q9Y2U5	Positive
P34949	Positive
P46098	Positive
P56282	Positive
Q9P0X4	Positive
P51692	Positive
P11836	Positive
P29317	Positive
P00533	Positive
P27487	Positive
O43451	Positive
P49895	Positive
Q14123	Positive
Q13509	Positive
P30536	Positive
P30085	Positive
P14867	Positive
P05412	Positive
Q9UQQ2	Positive
P12268	Positive
Q12791	Positive
Q9NRF9	Positive
P21554	Positive
P78508	Positive
P37088	Positive
P08235	Positive
P51681	Positive
P28482	Positive
Q16881	Positive
Q06432	Positive
Q13332	Positive
P33681	Positive
Q9HAB3	Positive
P04818	Positive
Q01718	Positive
P08069	Positive
P51788	Positive
O75762	Positive
P06401	Positive
Q02643	Positive
P43088	Positive
P15509	Positive
P17948	Positive
P20309	Positive
P14902	Positive
P07101	Positive
O43497	Positive
P08631	Positive
P41143	Positive
P08887	Positive
O76074	Positive
P21731	Positive
P14679	Positive
Q14626	Positive
O95342	Positive
P35354	Positive
P00747	Positive
P55011	Positive
O15554	Positive
P50135	Positive
P07202	Positive
P62937	Positive
P40189	Positive
P06241	Positive
Q14524	Positive
P33527	Positive
Q96RI1	Positive
P29274	Positive
P39086	Positive
P36888	Positive
P01589	Positive
Q07864	Positive
O94788	Positive
P48551	Positive
P08185	Positive
Q9NR97	Positive
Q01064	Positive
Q7Z2W7	Positive
P10721	Positive
P16473	Positive
Q9H169	Positive
Q14573	Positive
P08246	Positive
P30556	Positive
P68366	Positive
P04083	Positive
P01031	Positive
P00742	Positive
P07948	Positive
P05023	Positive
P14784	Positive
P16066	Positive
P05093	Positive
P40763	Positive
P38435	Positive
P11473	Positive
P23921	Positive
P42684	Positive
P33151	Positive
Q92731	Positive
P41595	Positive
P00813	Positive
P40238	Positive
P15538	Positive
O00519	Positive
P01130	Positive
P28062	Positive
P20273	Positive
P29275	Positive
P78559	Positive
Q12809	Positive
P05108	Positive
P06746	Positive
P24385	Positive
P11274	Positive
P63316	Positive
P48039	Positive
P28222	Positive
Q14432	Positive
P01584	Positive
Q9NPF7	Positive
P00918	Positive
Q13555	Positive
P20648	Positive
P28223	Positive
P06239	Positive
P12235	Positive
P00451	Positive
P21918	Positive
P51843	Positive
P11388	Positive
P20645	Positive
Q05940	Positive
Q12879	Positive
P28221	Positive
Q7LG56	Positive
P62158	Positive
Q9BQB6	Positive
Q14643	Positive
P06276	Positive
P05546	Positive
O75907	Positive
P24530	Positive
P40306	Positive
P49327	Positive
P21397	Positive
P33765	Positive
P07947	Positive
P04229	Positive
P11229	Positive
P37231	Positive
P21728	Positive
P08913	Positive
P05230	Positive
P00797	Positive
Q4U2R8	Positive
P08684	Positive
P20618	Positive
P38484	Positive
P42345	Positive
P16234	Positive
P39023	Positive
P11362	Positive
Q08499	Positive
P49721	Positive
Q08881	Positive
P80404	Positive
P20138	Positive
Q15822	Positive
O95180	Positive
Q99062	Positive
P04626	Positive
P30518	Positive
P60880	Positive
Q9UJT0	Positive
Q08345	Positive
P08908	Positive
P11137	Positive
Q9UI33	Positive
P30968	Positive
P06213	Positive
P49788	Positive
P32239	Positive
P35916	Positive
P22455	Positive
P12259	Positive
Q13621	Positive
P04150	Positive
P30988	Positive
P31358	Positive
P08473	Positive
P07949	Positive
O00763	Positive
P13631	Positive
P03897	Positive
P09874	Positive
Q04609	Positive
P10635	Positive
P08588	Positive
Q16832	Positive
P06126	Positive
P07437	Positive
P04070	Positive
P42081	Positive
P23219	Positive
Q06278	Positive
P21802	Positive
P20711	Positive
Q969P6	Positive
P11168	Positive
P11802	Unlabelled
O60674	Unlabelled
P50219	Unlabelled
Q9NPI8	Unlabelled
Q9Y6K1	Unlabelled
Q96K83	Unlabelled
Q01844	Unlabelled
P21912	Unlabelled
Q16559	Unlabelled
Q15596	Unlabelled
Q8N4C6	Unlabelled
P16220	Unlabelled
Q15276	Unlabelled
Q9Y3A5	Unlabelled
P62633	Unlabelled
Q13765	Unlabelled
Q92570	Unlabelled
Q9BYW2	Unlabelled
P42773	Unlabelled
P10644	Unlabelled
P31431	Unlabelled
Q03111	Unlabelled
Q9BXL7	Unlabelled
Q14141	Unlabelled
Q9NQB0	Unlabelled
Q99581	Unlabelled
P23771	Unlabelled
Q13635	Unlabelled
P40424	Unlabelled
Q86VS8	Unlabelled
Q13422	Unlabelled
Q9HC35	Unlabelled
P15976	Unlabelled
Q92733	Unlabelled
P54821	Unlabelled
Q02548	Unlabelled
Q99453	Unlabelled
P15056	Unlabelled
O00512	Unlabelled
Q14240	Unlabelled
O95999	Unlabelled
P62805	Unlabelled
Q15831	Unlabelled
O95436	Unlabelled
O00712	Unlabelled
P06748	Unlabelled
P51532	Unlabelled
Q99081	Unlabelled
Q9HC73	Unlabelled
Q16236	Unlabelled
Q9NZN5	Unlabelled
P31270	Unlabelled
P22626	Unlabelled
Q99607	Unlabelled
P17844	Unlabelled
P50549	Unlabelled
Q14568	Unlabelled
Q9NQC7	Unlabelled
Q92574	Unlabelled
Q9UER7	Unlabelled
P21580	Unlabelled
Q01196	Unlabelled
Q9NZQ3	Unlabelled
Q5VU43	Unlabelled
Q04721	Unlabelled
P06400	Unlabelled
P26038	Unlabelled
P45985	Unlabelled
P04198	Unlabelled
P54277	Unlabelled
Q15532	Unlabelled
P46531	Unlabelled
P0CJ86	Unlabelled
Q9BXW9	Unlabelled
P09669	Unlabelled
P22681	Unlabelled
Q9UH73	Unlabelled
Q9UPN9	Unlabelled
P49789	Unlabelled
O95633	Unlabelled
Q02223	Unlabelled
Q9UKU0	Unlabelled
P35453	Unlabelled
Q92889	Unlabelled
P01106	Unlabelled
P08238	Unlabelled
Q8IZP0	Unlabelled
P24864	Unlabelled
P25054	Unlabelled
Q92804	Unlabelled
P36894	Unlabelled
Q15059	Unlabelled
Q92794	Unlabelled
P52306	Unlabelled
P02786	Unlabelled
Q92597	Unlabelled
Q99719	Unlabelled
Q8N726	Unlabelled
P08922	Unlabelled
O15287	Unlabelled
Q99961	Unlabelled
P18846	Unlabelled
Q92956	Unlabelled
P13796	Unlabelled
Q14847	Unlabelled
P23193	Unlabelled
Q9UIF7	Unlabelled
P15882	Unlabelled
P84243	Unlabelled
P42336	Unlabelled
Q96JT2	Unlabelled
O95573	Unlabelled
Q9BZE9	Unlabelled
Q9NQX3	Unlabelled
Q7Z7A1	Unlabelled
P14373	Unlabelled
P84103	Unlabelled
Q9NYV4	Unlabelled
P55199	Unlabelled
Q12967	Unlabelled
P19532	Unlabelled
Q9NPC3	Unlabelled
P25791	Unlabelled
Q9HAZ2	Unlabelled
Q8IUD2	Unlabelled
P28715	Unlabelled
Q96T37	Unlabelled
P54278	Unlabelled
Q68D20	Unlabelled
Q96RU3	Unlabelled
Q9UPY3	Unlabelled
Q9NZQ7	Unlabelled
Q96PJ5	Unlabelled
P31276	Unlabelled
P02452	Unlabelled
Q9UBX2	Unlabelled
O95684	Unlabelled
O15393	Unlabelled
P42768	Unlabelled
P60484	Unlabelled
Q15233	Unlabelled
Q00534	Unlabelled
P11912	Unlabelled
Q92989	Unlabelled
P46100	Unlabelled
P31271	Unlabelled
Q68CP9	Unlabelled
Q15643	Unlabelled
O14497	Unlabelled
P55197	Unlabelled
Q9H009	Unlabelled
Q93063	Unlabelled
Q9NX18	Unlabelled
Q9HBE5	Unlabelled
O75874	Unlabelled
P31751	Unlabelled
P19484	Unlabelled
P30281	Unlabelled
O75626	Unlabelled
P04049	Unlabelled
P0CJ90	Unlabelled
P35579	Unlabelled
P30153	Unlabelled
Q92793	Unlabelled
P0CJ88	Unlabelled
P42568	Unlabelled
Q01831	Unlabelled
P35658	Unlabelled
Q9BZ95	Unlabelled
P27540	Unlabelled
Q13315	Unlabelled
Q9Y2W1	Unlabelled
Q9NQX6	Unlabelled
P12980	Unlabelled
P52926	Unlabelled
P58340	Unlabelled
Q15910	Unlabelled
Q12824	Unlabelled
Q13489	Unlabelled
P07954	Unlabelled
P41182	Unlabelled
Q13191	Unlabelled
Q8NEZ4	Unlabelled
P56279	Unlabelled
O15360	Unlabelled
O15534	Unlabelled
Q01543	Unlabelled
Q96AJ9	Unlabelled
P31277	Unlabelled
P49589	Unlabelled
Q008S8	Unlabelled
O60224	Unlabelled
Q86VZ1	Unlabelled
Q16534	Unlabelled
O75475	Unlabelled
Q96DH6	Unlabelled
Q9BX63	Unlabelled
O75444	Unlabelled
Q13951	Unlabelled
Q99983	Unlabelled
P33176	Unlabelled
P54132	Unlabelled
Q6N021	Unlabelled
Q13492	Unlabelled
P35268	Unlabelled
Q8TF68	Unlabelled
O15315	Unlabelled
Q96L73	Unlabelled
Q86YC2	Unlabelled
O00255	Unlabelled
P12270	Unlabelled
Q16385	Unlabelled
Q8NG68	Unlabelled
P26196	Unlabelled
Q9Y5W5	Unlabelled
O14686	Unlabelled
P23246	Unlabelled
Q9UHB7	Unlabelled
P01111	Unlabelled
Q8IVF1	Unlabelled
P62324	Unlabelled
Q00987	Unlabelled
Q6UN15	Unlabelled
P12830	Unlabelled
P35637	Unlabelled
P01116	Unlabelled
Q8NG31	Unlabelled
P40692	Unlabelled
Q9H2T7	Unlabelled
P43405	Unlabelled
O75081	Unlabelled
P63092	Unlabelled
O43248	Unlabelled
Q9Y5Q3	Unlabelled
P23760	Unlabelled
Q15468	Unlabelled
P23025	Unlabelled
Q9BUK0	Unlabelled
Q9UHD8	Unlabelled
Q969V6	Unlabelled
Q13516	Unlabelled
O75533	Unlabelled
P43268	Unlabelled
P20823	Unlabelled
Q16288	Unlabelled
Q03112	Unlabelled
P41161	Unlabelled
O43524	Unlabelled
Q9HCM3	Unlabelled
P15311	Unlabelled
Q9UDY8	Unlabelled
P42771	Unlabelled
Q6W2J9	Unlabelled
Q16204	Unlabelled
Q96AE4	Unlabelled
Q00610	Unlabelled
Q16394	Unlabelled
Q9HB96	Unlabelled
Q9C0K0	Unlabelled
Q15154	Unlabelled
Q9BQ51	Unlabelled
Q86XK2	Unlabelled
P48735	Unlabelled
P19544	Unlabelled
Q99836	Unlabelled
P20151	Unlabelled
P55196	Unlabelled
P25800	Unlabelled
Q5JWF2	Unlabelled
P52701	Unlabelled
P21359	Unlabelled
Q14191	Unlabelled
P0CJ89	Unlabelled
Q13015	Unlabelled
P14222	Unlabelled
Q99612	Unlabelled
P43246	Unlabelled
P04233	Unlabelled
P19447	Unlabelled
P01112	Unlabelled
Q09472	Unlabelled
P25445	Unlabelled
Q9BZK3	Unlabelled
Q16633	Unlabelled
P43699	Unlabelled
Q86UB2	Unlabelled
P30279	Unlabelled
Q5JTC6	Unlabelled
Q6DJT9	Unlabelled
O96028	Unlabelled
O14980	Unlabelled
O95467	Unlabelled
Q15306	Unlabelled
Q9HBE1	Unlabelled
Q15011	Unlabelled
P29992	Unlabelled
P68402	Unlabelled
P50148	Unlabelled
P04843	Unlabelled
P35659	Unlabelled
Q70SY1	Unlabelled
Q12778	Unlabelled
Q86UP2	Unlabelled
Q969H0	Unlabelled
Q99643	Unlabelled
Q03164	Unlabelled
Q86Y26	Unlabelled
P42566	Unlabelled
O43295	Unlabelled
P52333	Unlabelled
O15151	Unlabelled
P35125	Unlabelled
P18074	Unlabelled
O00291	Unlabelled
Q96RK0	Unlabelled
P40259	Unlabelled
P07900	Unlabelled
Q00653	Unlabelled
O15550	Unlabelled
P23769	Unlabelled
Q9Y5J3	Unlabelled
O15524	Unlabelled
P0C1Z6	Unlabelled
Q01081	Unlabelled
P33076	Unlabelled
Q4VC05	Unlabelled
Q93074	Unlabelled
Q5VWP2	Unlabelled
Q9UNA1	Unlabelled
Q15669	Unlabelled
P55287	Unlabelled
Q05516	Unlabelled
Q9Y693	Unlabelled
P51654	Unlabelled
Q06710	Unlabelled
P17542	Unlabelled
Q16384	Unlabelled
Q96BA8	Unlabelled
Q6UUV7	Unlabelled
P40337	Unlabelled
P35222	Unlabelled
Q06124	Unlabelled
P62258	Unlabelled
Q92560	Unlabelled
P11308	Unlabelled
P41229	Unlabelled
Q04864	Unlabelled
P29590	Unlabelled
Q9ULV8	Unlabelled
P10242	Unlabelled
Q8IXJ9	Unlabelled
Q86U86	Unlabelled
P49915	Unlabelled
O60934	Unlabelled
Q9H334	Unlabelled
P17096	Unlabelled
O14521	Unlabelled
P51825	Unlabelled
Q8IZL2	Unlabelled
Q15022	Unlabelled
Q5M775	Unlabelled
Q8WVQ1	Unlabelled
O60861	Unlabelled
P52948	Unlabelled
P38398	Unlabelled
P28324	Unlabelled
P51587	Unlabelled
O60885	Unlabelled
Q06136	Unlabelled
Q15788	Unlabelled
P35749	Unlabelled
Q8IWS0	Unlabelled
P27986	Unlabelled
Q99626	Unlabelled
P55198	Unlabelled
P10415	Unlabelled
P41212	Unlabelled
P42702	Unlabelled
P12524	Unlabelled
P48431	Unlabelled
Q6UXM1	Unlabelled
P50570	Unlabelled
P23458	Unlabelled
P04637	Unlabelled
Q9H165	Unlabelled
Q8WYB5	Unlabelled
Q86VZ6	Unlabelled
P25106	Unlabelled
Q13772	Unlabelled
P05091	Unlabelled
O60566	Unlabelled
P60568	Unlabelled
Q9UM73	Unlabelled
P35638	Unlabelled
O15164	Unlabelled
Q96E14	Unlabelled
Q99996	Unlabelled
Q92466	Unlabelled
O43711	Unlabelled
Q9HD26	Unlabelled
P51826	Unlabelled
Q01860	Unlabelled
Q00597	Unlabelled
P11309	Unlabelled
Q10571	Unlabelled
Q13206	Unlabelled
P31269	Unlabelled
P06753	Unlabelled
P56278	Unlabelled
P84996	Unlabelled
P15923	Unlabelled
Q01105	Unlabelled
Q92734	Unlabelled
Q8NFU7	Unlabelled
Q9UMX1	Unlabelled
P67936	Unlabelled
Q16549	Unlabelled
Q93052	Unlabelled
P53675	Unlabelled
Q9H6R7	Unlabelled
P49715	Unlabelled
Q01130	Unlabelled
Q06455	Unlabelled
Q8NFG4	Unlabelled
O75177	Unlabelled
P35240	Unlabelled
Q13485	Unlabelled
P01127	Unlabelled
P29375	Unlabelled
Q8TBA6	Unlabelled
P31994	Unlabelled
Q14980	Unlabelled
P31314	Unlabelled
P23759	Unlabelled
O96017	Unlabelled
Q9UBW7	Unlabelled
P20749	Unlabelled
Q15696	Unlabelled
P98177	Unlabelled
O75030	Unlabelled
Q9UKJ5	Unlabelled
P58012	Unlabelled
P0CJ85	Unlabelled
P49815	Unlabelled

## Sheet: GPCR
P21462	Positive
Q99835	Positive
P35348	Positive
P47871	Positive
P35368	Positive
P61073	Positive
Q8TE23	Positive
Q8NFJ5	Positive
P43119	Positive
P30988	Positive
Q14832	Positive
P30939	Positive
P37288	Positive
O75899	Positive
P35367	Positive
P08173	Positive
P25021	Positive
Q13639	Positive
P25103	Positive
P35372	Positive
P47901	Positive
P08912	Positive
P41180	Positive
O14842	Positive
Q9H244	Positive
P47898	Positive
P34995	Positive
Q01718	Positive
P43220	Positive
P35462	Positive
P08172	Positive
P35346	Positive
P47872	Positive
Q9BXA5	Positive
P30559	Positive
P21731	Positive
P08100	Positive
P34969	Positive
P21917	Positive
P30874	Positive
P25100	Positive
Q13258	Positive
P07550	Positive
P22888	Positive
Q14833	Positive
Q9Y271	Positive
P28335	Positive
P30542	Positive
P49146	Positive
P41594	Positive
Q9UBS5	Positive
P29275	Positive
P43116	Positive
P50052	Positive
P13945	Positive
P43115	Positive
P25024	Positive
P41145	Positive
Q96RJ0	Positive
Q13255	Positive
Q14831	Positive
P14416	Positive
P32238	Positive
O95665	Positive
P50406	Positive
P21554	Positive
P28223	Positive
P51681	Positive
Q9H228	Positive
P28222	Positive
Q02643	Positive
P43088	Positive
P20309	Positive
P41143	Positive
P18825	Positive
P30872	Positive
P30556	Positive
P29274	Positive
Q8TDS4	Positive
Q9NS75	Positive
P49286	Positive
P49019	Positive
P16473	Positive
P23945	Positive
Q9Y5Y4	Positive
P41231	Positive
P41595	Positive
Q9H3N8	Positive
P35408	Positive
P30411	Positive
P48039	Positive
P28566	Positive
P21918	Positive
P28221	Positive
Q6W5P4	Positive
P24530	Positive
P25101	Positive
O00222	Positive
P33765	Positive
P11229	Positive
P21728	Positive
P08913	Positive
Q96P88	Positive
P32745	Positive
P18089	Positive
P34972	Positive
P30518	Positive
P08908	Positive
P30968	Positive
P32239	Positive
Q9Y5N1	Positive
P08588	Positive
Q03431	Positive
Q14416	Positive
Q14330	Positive
Q15617	Unlabelled
Q96R54	Unlabelled
Q8NH16	Unlabelled
Q99705	Unlabelled
Q14439	Unlabelled
P46095	Unlabelled
P0C626	Unlabelled
Q49SQ1	Unlabelled
O76000	Unlabelled
Q8NGE0	Unlabelled
Q6IEZ7	Unlabelled
P51685	Unlabelled
Q8NHC6	Unlabelled
Q86SP6	Unlabelled
P33032	Unlabelled
Q9GZK3	Unlabelled
Q8NHB7	Unlabelled
Q8NGV6	Unlabelled
Q9GZK4	Unlabelled
Q14246	Unlabelled
P30954	Unlabelled
Q8NGJ9	Unlabelled
A4D2G3	Unlabelled
Q8NH03	Unlabelled
Q8NH69	Unlabelled
P58180	Unlabelled
P0C617	Unlabelled
Q8NGI7	Unlabelled
Q8NH50	Unlabelled
Q8NH06	Unlabelled
Q9H2C5	Unlabelled
Q8N628	Unlabelled
Q8NGQ2	Unlabelled
Q8NDV2	Unlabelled
Q8NH74	Unlabelled
P46091	Unlabelled
Q9P1Q5	Unlabelled
Q7RTX1	Unlabelled
Q8NH76	Unlabelled
Q9H340	Unlabelled
Q96P65	Unlabelled
P59533	Unlabelled
Q9H209	Unlabelled
Q13467	Unlabelled
Q9BPV8	Unlabelled
Q9NZH0	Unlabelled
Q8NGR3	Unlabelled
P0C7N1	Unlabelled
Q8NGJ7	Unlabelled
Q9H343	Unlabelled
P34998	Unlabelled
Q8NGX9	Unlabelled
Q9NS66	Unlabelled
Q8IWK6	Unlabelled
Q8NGR4	Unlabelled
Q8NGC7	Unlabelled
Q8IZF5	Unlabelled
Q9NYQ7	Unlabelled
Q8TDU9	Unlabelled
Q8TDV2	Unlabelled
O95013	Unlabelled
Q8NG98	Unlabelled
Q8IZP9	Unlabelled
Q8NH85	Unlabelled
Q8NGZ2	Unlabelled
Q8NGZ9	Unlabelled
Q96P68	Unlabelled
Q6IF99	Unlabelled
P0C645	Unlabelled
A6NJZ3	Unlabelled
O00144	Unlabelled
O60241	Unlabelled
Q13607	Unlabelled
P46663	Unlabelled
Q9BXC1	Unlabelled
Q8NGT0	Unlabelled
O00270	Unlabelled
Q8NGR2	Unlabelled
Q8NG92	Unlabelled
Q8NH72	Unlabelled
Q8NH41	Unlabelled
Q8NGY7	Unlabelled
P59539	Unlabelled
Q8NGF4	Unlabelled
O43194	Unlabelled
P59544	Unlabelled
Q8NGF3	Unlabelled
P0C623	Unlabelled
Q13324	Unlabelled
Q8NH57	Unlabelled
Q8NGY3	Unlabelled
Q96R09	Unlabelled
Q8NGG3	Unlabelled
P32247	Unlabelled
A6NET4	Unlabelled
Q5T848	Unlabelled
Q8NH40	Unlabelled
Q96RI0	Unlabelled
A6NFC9	Unlabelled
P48146	Unlabelled
P59531	Unlabelled
Q8NH93	Unlabelled
Q5JRS4	Unlabelled
Q8NGF6	Unlabelled
Q8NG75	Unlabelled
O15303	Unlabelled
Q96KK4	Unlabelled
Q8N0Y5	Unlabelled
Q8NGC4	Unlabelled
Q8NGH3	Unlabelled
Q9NPG1	Unlabelled
Q8NGJ6	Unlabelled
Q9GZQ6	Unlabelled
P35414	Unlabelled
Q8NH90	Unlabelled
P51679	Unlabelled
Q8IYL9	Unlabelled
Q8NH08	Unlabelled
Q8NGY6	Unlabelled
A6NL08	Unlabelled
P21453	Unlabelled
P47890	Unlabelled
Q8TDV5	Unlabelled
Q8NGW1	Unlabelled
Q96R08	Unlabelled
Q8NG80	Unlabelled
Q7Z3T1	Unlabelled
Q8NGC9	Unlabelled
O75473	Unlabelled
P34981	Unlabelled
Q8IZF3	Unlabelled
Q7Z601	Unlabelled
Q99527	Unlabelled
Q8NGR9	Unlabelled
Q9UNW8	Unlabelled
Q8NGJ2	Unlabelled
O15218	Unlabelled
Q01726	Unlabelled
Q8NH55	Unlabelled
Q99463	Unlabelled
P47900	Unlabelled
A6NMZ5	Unlabelled
Q96R69	Unlabelled
Q92633	Unlabelled
Q8NH01	Unlabelled
O95977	Unlabelled
Q8NH64	Unlabelled
P25929	Unlabelled
P51686	Unlabelled
Q969N4	Unlabelled
Q8NGA2	Unlabelled
Q9UHX3	Unlabelled
Q8NG94	Unlabelled
Q8NHA6	Unlabelled
Q9NYV8	Unlabelled
Q13585	Unlabelled
Q8NGF7	Unlabelled
Q96R30	Unlabelled
Q8NG84	Unlabelled
Q8NH89	Unlabelled
P35410	Unlabelled
A6NDH6	Unlabelled
A6NHG9	Unlabelled
P59541	Unlabelled
Q8NGY1	Unlabelled
Q8NGP3	Unlabelled
Q8IZF2	Unlabelled
Q8NGA1	Unlabelled
Q6DWJ6	Unlabelled
Q8N127	Unlabelled
O15529	Unlabelled
P46092	Unlabelled
P47881	Unlabelled
Q8NH83	Unlabelled
Q8NGC8	Unlabelled
P46094	Unlabelled
Q8NGU2	Unlabelled
P48145	Unlabelled
A6NCV1	Unlabelled
Q8NGE5	Unlabelled
P59538	Unlabelled
Q8NG77	Unlabelled
P59540	Unlabelled
Q8NGG7	Unlabelled
Q8NGL3	Unlabelled
Q8NGN1	Unlabelled
Q15761	Unlabelled
Q9UKL2	Unlabelled
Q8NGI2	Unlabelled
O00574	Unlabelled
Q8NGL4	Unlabelled
P0C604	Unlabelled
P41586	Unlabelled
Q8NGR8	Unlabelled
Q8NGQ1	Unlabelled
P46093	Unlabelled
O75084	Unlabelled
O60431	Unlabelled
Q8NGS4	Unlabelled
Q8NGU9	Unlabelled
Q8NG81	Unlabelled
Q8NGR1	Unlabelled
Q8NGP0	Unlabelled
Q8NGA6	Unlabelled
Q9NYW1	Unlabelled
Q9Y4A9	Unlabelled
Q8NGH9	Unlabelled
Q6IEY1	Unlabelled
P55085	Unlabelled
Q9NQN1	Unlabelled
Q8NGK6	Unlabelled
Q9UHM6	Unlabelled
Q8TDS5	Unlabelled
Q6IEU7	Unlabelled
A3KFT3	Unlabelled
Q8NGI0	Unlabelled
Q16602	Unlabelled
Q9P1P4	Unlabelled
Q8NH42	Unlabelled
P25025	Unlabelled
A6NF89	Unlabelled
Q8TCW9	Unlabelled
Q8NGN8	Unlabelled
Q8NGP8	Unlabelled
Q8NH81	Unlabelled
Q8NH04	Unlabelled
Q13606	Unlabelled
Q9NYW4	Unlabelled
Q9NYV7	Unlabelled
O43613	Unlabelled
Q8NGG0	Unlabelled
Q8NGJ4	Unlabelled
O95006	Unlabelled
Q8NGS3	Unlabelled
Q8NGB6	Unlabelled
O00155	Unlabelled
Q9NQS5	Unlabelled
Q99788	Unlabelled
Q8IZF6	Unlabelled
Q9HBW0	Unlabelled
O00398	Unlabelled
O95800	Unlabelled
Q8N0Y3	Unlabelled
Q8N146	Unlabelled
P58182	Unlabelled
Q96RA2	Unlabelled
Q8NGH5	Unlabelled
Q8NGG6	Unlabelled
Q9BZJ8	Unlabelled
Q96RB7	Unlabelled
Q8WZ92	Unlabelled
Q8NGL0	Unlabelled
Q9HAR2	Unlabelled
Q96RD3	Unlabelled
Q8NGJ8	Unlabelled
P32248	Unlabelled
Q5T6X5	Unlabelled
Q99500	Unlabelled
Q8NGI4	Unlabelled
O43869	Unlabelled
Q96P66	Unlabelled
Q9Y5X5	Unlabelled
O60403	Unlabelled
A6NKK0	Unlabelled
P50391	Unlabelled
Q8NGQ3	Unlabelled
P0C628	Unlabelled
Q9UPC5	Unlabelled
Q96P67	Unlabelled
P48546	Unlabelled
Q99677	Unlabelled
P30953	Unlabelled
Q9NPB9	Unlabelled
A6NHA9	Unlabelled
Q8NGK0	Unlabelled
Q8NGL7	Unlabelled
Q15622	Unlabelled
Q96K78	Unlabelled
Q8NFZ6	Unlabelled
Q8NGJ5	Unlabelled
B2RN74	Unlabelled
Q9NZP5	Unlabelled
Q8NGN3	Unlabelled
Q99679	Unlabelled
Q9NYW7	Unlabelled
Q8NGK4	Unlabelled
O60353	Unlabelled
Q96LB0	Unlabelled
P41587	Unlabelled
P30989	Unlabelled
Q9UGF7	Unlabelled
Q8NGL6	Unlabelled
P25116	Unlabelled
Q8NGN5	Unlabelled
A6NMU1	Unlabelled
Q15619	Unlabelled
Q8NGA5	Unlabelled
Q8NGG1	Unlabelled
Q96R28	Unlabelled
Q9UP38	Unlabelled
Q8NGC1	Unlabelled
Q9UBY5	Unlabelled
P31391	Unlabelled
Q9HCU4	Unlabelled
Q8NGF8	Unlabelled
Q8IXE1	Unlabelled
Q8NH43	Unlabelled
Q86VZ1	Unlabelled
Q8NH10	Unlabelled
P0C7T2	Unlabelled
P43657	Unlabelled
P0C646	Unlabelled
Q96P69	Unlabelled
Q9H461	Unlabelled
Q8NH19	Unlabelled
Q8NGN7	Unlabelled
Q96PE1	Unlabelled
Q96RD0	Unlabelled
P58173	Unlabelled
Q96R48	Unlabelled
P59922	Unlabelled
Q8NGY5	Unlabelled
Q8NGA8	Unlabelled
Q6IF00	Unlabelled
Q9UJ42	Unlabelled
Q8NG83	Unlabelled
P47211	Unlabelled
Q8NGW6	Unlabelled
Q8NGP4	Unlabelled
Q8NH70	Unlabelled
Q8NH63	Unlabelled
Q8NGJ3	Unlabelled
Q8TDU6	Unlabelled
O95222	Unlabelled
Q9HBW9	Unlabelled
A6NM76	Unlabelled
Q8NGV0	Unlabelled
O60412	Unlabelled
Q9BY15	Unlabelled
Q8NGD3	Unlabelled
O15354	Unlabelled
Q8NGB4	Unlabelled
Q96CH1	Unlabelled
A6NMS3	Unlabelled
Q8NG85	Unlabelled
Q8NFJ6	Unlabelled
O95221	Unlabelled
Q15612	Unlabelled
Q8NH73	Unlabelled
Q8NGT2	Unlabelled
Q8NGD1	Unlabelled
Q9BXC0	Unlabelled
Q8NGK1	Unlabelled
O60883	Unlabelled
Q8NGV5	Unlabelled
Q16538	Unlabelled
Q8NGE3	Unlabelled
Q8NHA8	Unlabelled
Q8NGS8	Unlabelled
Q969F8	Unlabelled
Q9H1Y3	Unlabelled
A6NL26	Unlabelled
P49682	Unlabelled
Q15722	Unlabelled
Q8NGZ4	Unlabelled
Q7Z602	Unlabelled
Q9NQ84	Unlabelled
O95047	Unlabelled
Q8NGJ0	Unlabelled
Q8NGL1	Unlabelled
Q969V1	Unlabelled
Q9H210	Unlabelled
Q8NH05	Unlabelled
Q9BY21	Unlabelled
Q8NGX1	Unlabelled
Q8NGX0	Unlabelled
Q96RI8	Unlabelled
Q6IEV9	Unlabelled
Q8NGT5	Unlabelled
Q6PRD1	Unlabelled
Q8NHB1	Unlabelled
P47888	Unlabelled
Q15743	Unlabelled
Q8NGB9	Unlabelled
Q8NH56	Unlabelled
Q9HC97	Unlabelled
Q8NGD4	Unlabelled
Q8NGC3	Unlabelled
Q96G91	Unlabelled
Q8NGS0	Unlabelled
Q9H342	Unlabelled
Q8NH53	Unlabelled
Q9H2C8	Unlabelled
P30550	Unlabelled
P0C7T3	Unlabelled
Q86SQ6	Unlabelled
P32241	Unlabelled
Q8NGT7	Unlabelled
Q8NGF1	Unlabelled
O14843	Unlabelled
Q8WZA6	Unlabelled
Q7Z7M1	Unlabelled
Q96R45	Unlabelled
Q8NH00	Unlabelled
P48960	Unlabelled
A6NH00	Unlabelled
Q9NYM4	Unlabelled
P49685	Unlabelled
Q96RC9	Unlabelled
Q8NGM9	Unlabelled
O95136	Unlabelled
Q8NGN2	Unlabelled
Q8NGD0	Unlabelled
O60404	Unlabelled
Q8NHA4	Unlabelled
Q8IZF7	Unlabelled
Q86SQ3	Unlabelled
O94910	Unlabelled
Q8NGE1	Unlabelled
Q8NGN6	Unlabelled
Q6IF82	Unlabelled
P59534	Unlabelled
Q96LB1	Unlabelled
Q7Z5H4	Unlabelled
Q8NGJ1	Unlabelled
Q8TDS7	Unlabelled
Q92847	Unlabelled
P32246	Unlabelled
Q9UGF5	Unlabelled
Q8WXD0	Unlabelled
Q6IFH4	Unlabelled
Q8NGE8	Unlabelled
Q8NGQ6	Unlabelled
Q8NH07	Unlabelled
O43749	Unlabelled
Q9NYW0	Unlabelled
Q8NGH8	Unlabelled
Q9UKP6	Unlabelled
Q8NH49	Unlabelled
A6NDL8	Unlabelled
Q9H339	Unlabelled
Q9NZP0	Unlabelled
Q8NGH6	Unlabelled
Q8NGI3	Unlabelled
O43193	Unlabelled
Q9GZQ4	Unlabelled
Q8IZF4	Unlabelled
Q8NG99	Unlabelled
P59543	Unlabelled
Q8NGX6	Unlabelled
Q8NGD2	Unlabelled
Q8N349	Unlabelled
Q8NGA4	Unlabelled
Q8NGT9	Unlabelled
Q8NGE2	Unlabelled
Q8NGC6	Unlabelled
Q9GZK7	Unlabelled
Q8TDT2	Unlabelled
Q9BXE9	Unlabelled
Q8NGD5	Unlabelled
Q8NH37	Unlabelled
Q96AM1	Unlabelled
Q96LA9	Unlabelled
P49190	Unlabelled
Q9ULW2	Unlabelled
Q8NH02	Unlabelled
Q15391	Unlabelled
Q9NPC1	Unlabelled
Q8NGM8	Unlabelled
Q9HBX9	Unlabelled
Q9UGF6	Unlabelled
Q96R27	Unlabelled
Q9Y2T6	Unlabelled
P32245	Unlabelled
Q8NH09	Unlabelled
Q15620	Unlabelled
Q8NH80	Unlabelled
Q8NG78	Unlabelled
Q86SQ4	Unlabelled
Q8NGS5	Unlabelled
Q8NGL2	Unlabelled
Q6IFN5	Unlabelled
Q15614	Unlabelled
Q96RD2	Unlabelled
Q8NH95	Unlabelled
Q96RI9	Unlabelled
P04000	Unlabelled
Q6IF42	Unlabelled
P49683	Unlabelled
Q9Y585	Unlabelled
P51810	Unlabelled
P28336	Unlabelled
Q9NZD1	Unlabelled
Q32VQ0	Unlabelled
Q8TDV0	Unlabelled
Q8NH59	Unlabelled
P32302	Unlabelled
Q8NGK2	Unlabelled
Q8WXG9	Unlabelled
Q8NGV7	Unlabelled
P03999	Unlabelled
Q9NYW5	Unlabelled
A6NND4	Unlabelled
Q8NGP2	Unlabelled
Q9P296	Unlabelled
Q8NGY2	Unlabelled
Q8NGR5	Unlabelled
P59535	Unlabelled
Q9H344	Unlabelled
P41968	Unlabelled
O14718	Unlabelled
P41146	Unlabelled
Q8NGK9	Unlabelled
Q6U736	Unlabelled
P59536	Unlabelled
Q8NH18	Unlabelled
A6NM03	Unlabelled
P59551	Unlabelled
Q9HB89	Unlabelled
O14581	Unlabelled
Q9NSD7	Unlabelled
Q8NGC0	Unlabelled
Q8NGG2	Unlabelled
P59537	Unlabelled
P49238	Unlabelled
P25105	Unlabelled
Q9Y653	Unlabelled
O95007	Unlabelled
Q96R67	Unlabelled
Q8NGG8	Unlabelled
Q8NGI6	Unlabelled
Q14332	Unlabelled
P25090	Unlabelled
Q9GZP7	Unlabelled
Q8NGU4	Unlabelled
P0C629	Unlabelled
Q9Y5P0	Unlabelled
Q9NS67	Unlabelled
Q9P1P5	Unlabelled
Q9NYW3	Unlabelled
Q8NGF0	Unlabelled
Q8N148	Unlabelled
O60755	Unlabelled
Q8NGX2	Unlabelled
Q16581	Unlabelled
Q8NGB2	Unlabelled
P46089	Unlabelled
Q8NGA0	Unlabelled
Q8NGC2	Unlabelled
Q8NH87	Unlabelled
Q8N6U8	Unlabelled
Q8NH48	Unlabelled
Q96R47	Unlabelled
Q8NH51	Unlabelled
Q15760	Unlabelled
Q7RTX0	Unlabelled
Q96RD1	Unlabelled
Q15077	Unlabelled
Q15615	Unlabelled
Q86SM8	Unlabelled
Q8NH61	Unlabelled
Q9BZJ6	Unlabelled
Q8NGS7	Unlabelled
Q9HBX8	Unlabelled
Q8NH92	Unlabelled
O76001	Unlabelled
P51677	Unlabelled
Q6IF63	Unlabelled
O95371	Unlabelled
A6ND48	Unlabelled
Q16570	Unlabelled
Q5T601	Unlabelled
Q8NGN0	Unlabelled
P58170	Unlabelled
Q8NHC7	Unlabelled
O14626	Unlabelled
Q5TZ20	Unlabelled
Q6IFG1	Unlabelled
Q8NGR6	Unlabelled
Q8NGZ6	Unlabelled
Q9H207	Unlabelled
Q9Y2T5	Unlabelled
Q8NGQ4	Unlabelled
Q8NH94	Unlabelled
Q8NGP6	Unlabelled
Q8NGZ5	Unlabelled
Q8NGE9	Unlabelled
Q96LB2	Unlabelled
Q7RTR8	Unlabelled
Q8NFN8	Unlabelled
Q8NG76	Unlabelled
Q8NGF9	Unlabelled
P34982	Unlabelled
Q8NGZ0	Unlabelled
Q8NGY9	Unlabelled
Q6NV75	Unlabelled
Q9Y5P1	Unlabelled
Q8TCB6	Unlabelled
Q8NGY0	Unlabelled
Q9NZP2	Unlabelled
Q9GZM6	Unlabelled
O00254	Unlabelled
P04001	Unlabelled
Q8NGI8	Unlabelled
P47884	Unlabelled
A6NIJ9	Unlabelled
P04201	Unlabelled
Q9NYW2	Unlabelled
Q9H341	Unlabelled
Q8NGB8	Unlabelled
Q8NGZ3	Unlabelled
Q8NGK3	Unlabelled
Q8NGS6	Unlabelled
Q8NGI9	Unlabelled
P58181	Unlabelled
Q9H255	Unlabelled
Q13304	Unlabelled
P21730	Unlabelled
Q8NG95	Unlabelled
Q9GZK6	Unlabelled
Q9GZN0	Unlabelled
Q8NGS2	Unlabelled
Q8N162	Unlabelled
O14514	Unlabelled
P60893	Unlabelled
Q8NH60	Unlabelled
P21452	Unlabelled
Q6QNK2	Unlabelled
Q8NH79	Unlabelled
P47887	Unlabelled
P25106	Unlabelled
Q8NGG5	Unlabelled
Q9BZJ7	Unlabelled
O00590	Unlabelled
Q7Z5H5	Unlabelled
Q8NGK5	Unlabelled
Q9H205	Unlabelled
P47775	Unlabelled
P51582	Unlabelled
P32249	Unlabelled
P25089	Unlabelled
Q8NGI1	Unlabelled
Q8TDU5	Unlabelled
P47804	Unlabelled
O43603	Unlabelled
O76002	Unlabelled
P0C7N5	Unlabelled
P47883	Unlabelled
Q99680	Unlabelled
O76099	Unlabelled
Q86Y34	Unlabelled
Q8NG97	Unlabelled
O95490	Unlabelled
Q8NHC4	Unlabelled
Q8WZ84	Unlabelled
Q8NGL9	Unlabelled
Q9Y5Y3	Unlabelled
O95918	Unlabelled
Q8NH67	Unlabelled
P51684	Unlabelled
Q5UAW9	Unlabelled
Q9H1C0	Unlabelled
A6NGY5	Unlabelled
Q8NHC8	Unlabelled
Q8NH54	Unlabelled
Q8NGX3	Unlabelled
Q96R84	Unlabelled
Q8NGP9	Unlabelled
Q99678	Unlabelled
Q9H208	Unlabelled
Q8NGS9	Unlabelled
Q9NYV9	Unlabelled
Q96R72	Unlabelled
Q9NYW6	Unlabelled
O43614	Unlabelled
O15552	Unlabelled
O00421	Unlabelled
Q9Y3N9	Unlabelled
P29371	Unlabelled
Q9BXB1	Unlabelled
Q8NGX8	Unlabelled
Q8NGX5	Unlabelled
Q9NYQ6	Unlabelled
Q8NGM1	Unlabelled
Q8NGC5	Unlabelled
Q8NGS1	Unlabelled
P59542	Unlabelled
O14804	Unlabelled
Q9H346	Unlabelled
Q8NGG4	Unlabelled
O60242	Unlabelled
Q8IZ08	Unlabelled
Q8NGH7	Unlabelled
Q8NGN4	Unlabelled
O95838	Unlabelled
Q86SM5	Unlabelled
Q8WZ94	Unlabelled
Q8NGQ5	Unlabelled
Q8NH21	Unlabelled
Q9ULV1	Unlabelled
P41597	Unlabelled
Q5NUL3	Unlabelled
Q8NGT1	Unlabelled
P0C7N8	Unlabelled
Q8NHB8	Unlabelled
O75388	Unlabelled
Q8NHC5	Unlabelled
Q8NGE7	Unlabelled
P47893	Unlabelled
O76100	Unlabelled
Q5JQS5	Unlabelled
Q8NGU1	Unlabelled

## Sheet: IonChannel
Q15842	Positive
O15399	Positive
P51168	Positive
P51800	Positive
Q16445	Positive
Q12791	Positive
P48167	Positive
P78508	Positive
Q14500	Positive
P37088	Positive
Q04844	Positive
P47870	Positive
P42263	Positive
P28476	Positive
Q9NY72	Positive
Q9ULK0	Positive
O00591	Positive
P36544	Positive
P48058	Positive
P22459	Positive
Q05901	Positive
P51788	Positive
O75762	Positive
Q9Y257	Positive
P48549	Positive
P35499	Positive
P48169	Positive
Q9UK17	Positive
Q9H252	Positive
Q15858	Positive
Q12879	Positive
O15554	Positive
P24046	Positive
O00555	Positive
Q01668	Positive
Q9P0X4	Positive
Q9GZZ6	Positive
Q86W47	Positive
P48544	Positive
Q99250	Positive
O00180	Positive
P54284	Positive
P56696	Positive
O95069	Positive
O43497	Positive
O60391	Positive
A8MPY1	Positive
P13569	Positive
Q8NET8	Positive
Q08289	Positive
P51172	Positive
Q9UGM1	Positive
Q9NS40	Positive
Q9NZV8	Positive
Q14957	Positive
P31644	Positive
Q99928	Positive
P17658	Positive
P54289	Positive
P02708	Positive
P11230	Positive
Q7Z2W7	Positive
P17787	Positive
Q16099	Positive
Q05586	Positive
Q14524	Positive
P43681	Positive
Q9NSA2	Positive
P42261	Positive
P48051	Positive
Q92736	Positive
Q9UGI6	Positive
P39086	Positive
Q15413	Positive
P35498	Positive
P18505	Positive
Q9NPC2	Positive
Q8N1C3	Positive
Q8IZS8	Positive
P51170	Positive
Q9Y691	Positive
Q15822	Positive
O95180	Positive
Q00975	Positive
Q96PR1	Positive
P48048	Positive
Q13224	Positive
Q07699	Positive
Q8NER1	Positive
P15382	Positive
O60840	Positive
P51787	Positive
Q92952	Positive
Q16322	Positive
O14649	Positive
P18507	Positive
Q14573	Positive
Q9UI33	Positive
Q14003	Positive
Q9NR82	Positive
O14764	Positive
Q14654	Positive
Q9Y5Y9	Positive
O60939	Positive
Q06432	Positive
Q9NY46	Positive
P07510	Positive
P23415	Positive
Q14571	Positive
Q14643	Positive
Q13003	Positive
O43526	Positive
P22001	Positive
Q13698	Positive
Q96RD7	Positive
Q02641	Positive
P30926	Positive
P47869	Positive
Q13936	Positive
P78348	Positive
Q96RP8	Positive
Q5XXA6	Positive
P34903	Positive
Q8IWT1	Positive
Q9NPA1	Positive
Q16515	Positive
P46098	Positive
P22460	Positive
P48547	Positive
Q13002	Positive
O43525	Positive
Q16478	Positive
P30532	Positive
Q14721	Positive
P23416	Positive
P21817	Positive
P42262	Positive
Q09470	Positive
Q92953	Positive
O00305	Positive
Q15825	Positive
O75311	Positive
P16389	Positive
Q9NY47	Positive
Q07001	Positive
O43424	Positive
Q12809	Positive
Q8TCU5	Positive
P32297	Positive
Q9H2S1	Positive
P78334	Positive
Q16558	Positive
P14867	Positive
P28472	Positive
Q9UN88	Positive
P48995	Unlabelled
Q7RTX7	Unlabelled
Q9ULD8	Unlabelled
Q9HCX4	Unlabelled
Q9UL51	Unlabelled
O15547	Unlabelled
Q9Y6H6	Unlabelled
Q9Y6J6	Unlabelled
Q96KK3	Unlabelled
P04839	Unlabelled
Q9NZA1	Unlabelled
P62955	Unlabelled
Q9HBA0	Unlabelled
P35523	Unlabelled
Q7Z442	Unlabelled
Q9NY37	Unlabelled
O95259	Unlabelled
Q9H0Q3	Unlabelled
P56373	Unlabelled
Q8TDD5	Unlabelled
Q9Y2W7	Unlabelled
Q13563	Unlabelled
Q01118	Unlabelled
Q9HB14	Unlabelled
Q9NYG8	Unlabelled
P0CG08	Unlabelled
Q15049	Unlabelled
A1A5B4	Unlabelled
Q13303	Unlabelled
Q9NQ90	Unlabelled
Q9NZQ8	Unlabelled
Q8IZF0	Unlabelled
Q9NPI9	Unlabelled
Q9UBN4	Unlabelled
Q8NFU1	Unlabelled
O95279	Unlabelled
Q9H3M0	Unlabelled
Q92508	Unlabelled
Q9BXT2	Unlabelled
Q9UBL9	Unlabelled
Q9NZI2	Unlabelled
Q9C0H2	Unlabelled
Q70Z44	Unlabelled
Q03721	Unlabelled
Q6UVM3	Unlabelled
A5X5Y0	Unlabelled
Q8NFU0	Unlabelled
Q92806	Unlabelled
Q8NHX9	Unlabelled
Q8TD43	Unlabelled
Q96QZ0	Unlabelled
Q7Z3S7	Unlabelled
Q96RD6	Unlabelled
Q9NVV0	Unlabelled
Q9UHC3	Unlabelled
P57789	Unlabelled
Q9Y6N3	Unlabelled
Q7Z443	Unlabelled
Q9Y5S8	Unlabelled
Q9HCF6	Unlabelled
Q9NQW8	Unlabelled
B7U540	Unlabelled
Q9Y2U2	Unlabelled
Q5JUK3	Unlabelled
Q96DB9	Unlabelled
Q9NQA5	Unlabelled
Q9H5I5	Unlabelled
P58550	Unlabelled
Q9P0L9	Unlabelled
O60359	Unlabelled
O00168	Unlabelled
Q9UJ96	Unlabelled
Q6PIU1	Unlabelled
Q99712	Unlabelled
Q9HB15	Unlabelled
Q9UQD0	Unlabelled
O60928	Unlabelled
Q96D31	Unlabelled
Q75V66	Unlabelled
Q14028	Unlabelled
Q9NZM6	Unlabelled
Q9Y210	Unlabelled
Q9GZU1	Unlabelled
Q96P56	Unlabelled
Q8N1M1	Unlabelled
Q401N2	Unlabelled
Q7Z418	Unlabelled
O95264	Unlabelled
Q9ULS6	Unlabelled
Q6PIL6	Unlabelled
Q86XQ3	Unlabelled
Q8WWG9	Unlabelled
Q9Y696	Unlabelled
O94759	Unlabelled
B7ZAQ6	Unlabelled
O60741	Unlabelled
Q9Y342	Unlabelled
Q96D96	Unlabelled
Q7Z4N2	Unlabelled
Q8WXS4	Unlabelled
Q14802	Unlabelled
P58549	Unlabelled
P29973	Unlabelled
Q9P1Z3	Unlabelled
Q6IWH7	Unlabelled
Q9Y698	Unlabelled
Q96NY7	Unlabelled
Q96L42	Unlabelled
Q2I0M4	Unlabelled
Q9NW15	Unlabelled
Q8NEC5	Unlabelled
Q13507	Unlabelled
Q9UL62	Unlabelled
Q8WXA8	Unlabelled
Q8WXS5	Unlabelled
Q96FT7	Unlabelled
Q9UBN1	Unlabelled
Q16281	Unlabelled
Q16280	Unlabelled
Q9UF02	Unlabelled
Q96T55	Unlabelled
Q9UIX4	Unlabelled
O00299	Unlabelled
Q9BYT9	Unlabelled
A8MYU2	Unlabelled
Q9Y5S1	Unlabelled
Q96T54	Unlabelled
Q9Y3Q4	Unlabelled
Q9HCE9	Unlabelled
P59646	Unlabelled
Q9NTG1	Unlabelled
P51801	Unlabelled
Q8NCM2	Unlabelled
O43448	Unlabelled
Q9UQ05	Unlabelled
Q5JXX5	Unlabelled
Q8IU99	Unlabelled
Q9NS61	Unlabelled
O76090	Unlabelled
Q14722	Unlabelled
O15247	Unlabelled
O95833	Unlabelled
Q4KMQ2	Unlabelled
Q9ULQ1	Unlabelled
Q99571	Unlabelled
Q9H1D0	Unlabelled
Q15878	Unlabelled
P51575	Unlabelled
Q8IV77	Unlabelled
Q8TDN1	Unlabelled
Q96PH1	Unlabelled
Q9BQ31	Unlabelled
Q93086	Unlabelled
Q9H427	Unlabelled
Q8TDN2	Unlabelled
Q9UNX9	Unlabelled
Q9BSA4	Unlabelled
Q9H6F2	Unlabelled
P48050	Unlabelled
P63252	Unlabelled
Q8IZK6	Unlabelled
Q99572	Unlabelled
Q32M45	Unlabelled
Q8TAE7	Unlabelled
Q9H313	Unlabelled

## Sheet: Kinase
P08581	Positive
P23743	Positive
Q08345	Positive
Q02763	Positive
P42685	Positive
P04629	Positive
P07333	Positive
Q16671	Positive
Q13131	Positive
P24941	Positive
P04049	Positive
P09619	Positive
Q15759	Positive
P00519	Positive
P30613	Positive
Q13882	Positive
P35968	Positive
P30085	Positive
O15530	Positive
P12931	Positive
P55263	Positive
P06732	Positive
P14618	Positive
P22607	Positive
P36507	Positive
P27707	Positive
O60674	Positive
P78362	Positive
P31749	Positive
P37023	Positive
P23458	Positive
P10398	Positive
P27361	Positive
O14920	Positive
Q16760	Positive
Q9Y2U5	Positive
P16066	Positive
Q96Q40	Positive
P00533	Positive
P49619	Positive
P57059	Positive
P28482	Positive
Q16620	Positive
P11309	Positive
P08069	Positive
P17948	Positive
P08631	Positive
Q14289	Positive
P54886	Positive
P12277	Positive
P25098	Positive
P06241	Positive
P36888	Positive
Q02750	Positive
Q9UM73	Positive
P53667	Positive
P10721	Positive
P36896	Positive
P20594	Positive
P07948	Positive
Q07912	Positive
P12532	Positive
O00764	Positive
P42684	Positive
Q8NG66	Positive
P35626	Positive
P15056	Positive
P17540	Positive
P11274	Positive
O15111	Positive
Q13555	Positive
P06239	Positive
Q969G6	Positive
Q9H3S4	Positive
Q05655	Positive
P49841	Positive
P07947	Positive
P29317	Positive
P42345	Positive
P16234	Positive
P11362	Positive
Q08881	Positive
Q9UJ70	Positive
P04626	Positive
P25092	Positive
P06213	Positive
P35916	Positive
P22455	Positive
P05771	Positive
P17252	Positive
P07949	Positive
Q16832	Positive
Q04771	Positive
P21802	Positive
Q99683	Unlabelled
P11802	Unlabelled
P48736	Unlabelled
Q9BWU1	Unlabelled
O00141	Unlabelled
P32298	Unlabelled
Q6P2M8	Unlabelled
Q56UN5	Unlabelled
Q96PF2	Unlabelled
Q06418	Unlabelled
P11908	Unlabelled
Q38SD2	Unlabelled
Q5TCX8	Unlabelled
O15075	Unlabelled
Q8WU08	Unlabelled
Q16877	Unlabelled
Q96C45	Unlabelled
Q6ZWH5	Unlabelled
Q06187	Unlabelled
Q7Z2Y5	Unlabelled
Q13057	Unlabelled
Q5T6J7	Unlabelled
Q15835	Unlabelled
O75063	Unlabelled
Q16566	Unlabelled
Q00536	Unlabelled
Q05513	Unlabelled
P07332	Unlabelled
P54819	Unlabelled
Q9NYV4	Unlabelled
O15197	Unlabelled
Q8IWQ3	Unlabelled
Q00532	Unlabelled
Q9Y2K2	Unlabelled
Q9NPI5	Unlabelled
Q9UIJ7	Unlabelled
O00506	Unlabelled
Q76MJ5	Unlabelled
Q00535	Unlabelled
Q5T9C9	Unlabelled
P16591	Unlabelled
Q99611	Unlabelled
Q8TCT0	Unlabelled
Q8TD19	Unlabelled
Q86V86	Unlabelled
Q16654	Unlabelled
Q5S007	Unlabelled
O75414	Unlabelled
O94804	Unlabelled
Q9H2G2	Unlabelled
Q96RR4	Unlabelled
Q96PC2	Unlabelled
Q99558	Unlabelled
Q9P289	Unlabelled
O14986	Unlabelled
O00238	Unlabelled
O14730	Unlabelled
Q04759	Unlabelled
Q8NHU3	Unlabelled
Q9HC98	Unlabelled
Q96D53	Unlabelled
P54756	Unlabelled
P33981	Unlabelled
Q8IVH8	Unlabelled
O43683	Unlabelled
P27144	Unlabelled
Q96MA6	Unlabelled
Q7L7X3	Unlabelled
P51617	Unlabelled
P27987	Unlabelled
Q9UKI8	Unlabelled
Q7KZI7	Unlabelled
Q496M5	Unlabelled
A4QPH2	Unlabelled
Q02846	Unlabelled
Q6P5Z2	Unlabelled
Q6ZMQ8	Unlabelled
Q8IY84	Unlabelled
Q01415	Unlabelled
Q9BZL6	Unlabelled
Q8NCB2	Unlabelled
O94921	Unlabelled
Q00534	Unlabelled
Q9UQB9	Unlabelled
Q9NSY1	Unlabelled
Q96NX5	Unlabelled
Q9NRP7	Unlabelled
P50750	Unlabelled
P29597	Unlabelled
Q9BYP7	Unlabelled
Q9UBF8	Unlabelled
O14874	Unlabelled
Q4G0N4	Unlabelled
O60566	Unlabelled
Q8NE63	Unlabelled
P78356	Unlabelled
Q8IWB6	Unlabelled
Q9Y4K4	Unlabelled
Q9HBU6	Unlabelled
O00311	Unlabelled
Q7Z7A4	Unlabelled
P24723	Unlabelled
Q9Y6S9	Unlabelled
P80192	Unlabelled
Q13572	Unlabelled
P23919	Unlabelled
Q13627	Unlabelled
Q9Y6T7	Unlabelled
P53671	Unlabelled
O75460	Unlabelled
O00329	Unlabelled
Q9BZ23	Unlabelled
Q96RU8	Unlabelled
Q5VST9	Unlabelled
Q8TD08	Unlabelled
O43283	Unlabelled
P45985	Unlabelled
O43353	Unlabelled
Q09013	Unlabelled
Q92519	Unlabelled
P15735	Unlabelled
Q9BTU6	Unlabelled
Q13873	Unlabelled
Q8N568	Unlabelled
Q13670	Unlabelled
P54760	Unlabelled
Q5KSL6	Unlabelled
Q9HA47	Unlabelled
Q8TF76	Unlabelled
Q9NWZ5	Unlabelled
Q8NFD2	Unlabelled
Q9NVF9	Unlabelled
P49759	Unlabelled
Q96S53	Unlabelled
P51817	Unlabelled
P51841	Unlabelled
P04183	Unlabelled
P36894	Unlabelled
P54646	Unlabelled
Q86XP1	Unlabelled
P48729	Unlabelled
Q9NRH2	Unlabelled
P32189	Unlabelled
P08922	Unlabelled
Q00537	Unlabelled
Q8N0W3	Unlabelled
P53350	Unlabelled
Q05397	Unlabelled
P15531	Unlabelled
O15021	Unlabelled
P53355	Unlabelled
Q15418	Unlabelled
P07205	Unlabelled
P29322	Unlabelled
Q8N165	Unlabelled
P42336	Unlabelled
P49840	Unlabelled
Q9UIG0	Unlabelled
Q8IVS8	Unlabelled
Q96DU7	Unlabelled
Q05823	Unlabelled
Q6XUX3	Unlabelled
Q9H5K3	Unlabelled
Q6P0Q8	Unlabelled
O75582	Unlabelled
A4D2B8	Unlabelled
Q00526	Unlabelled
Q99755	Unlabelled
P49336	Unlabelled
P21108	Unlabelled
P57078	Unlabelled
Q96KB5	Unlabelled
Q9Y6M4	Unlabelled
Q9BXA6	Unlabelled
Q9BQI3	Unlabelled
Q5VT25	Unlabelled
Q15126	Unlabelled
Q8TAS1	Unlabelled
Q8NE28	Unlabelled
P49761	Unlabelled
O00444	Unlabelled
O00443	Unlabelled
Q9BZX2	Unlabelled
P49137	Unlabelled
Q6SA08	Unlabelled
P51955	Unlabelled
Q13153	Unlabelled
Q9NVE7	Unlabelled
O94768	Unlabelled
Q8N5S9	Unlabelled
Q99640	Unlabelled
O75191	Unlabelled
O43318	Unlabelled
Q9Y3S1	Unlabelled
P52564	Unlabelled
Q14012	Unlabelled
Q96J92	Unlabelled
Q13308	Unlabelled
Q9NR20	Unlabelled
Q8NEB9	Unlabelled
Q86Z02	Unlabelled
O95340	Unlabelled
Q8IU85	Unlabelled
O75914	Unlabelled
Q8TEA7	Unlabelled
Q58A45	Unlabelled
O95747	Unlabelled
Q13043	Unlabelled
Q15746	Unlabelled
Q9NYY3	Unlabelled
Q92989	Unlabelled
Q9UHJ6	Unlabelled
P45984	Unlabelled
Q8NI60	Unlabelled
Q13546	Unlabelled
Q32MK0	Unlabelled
P17858	Unlabelled
Q9UF33	Unlabelled
Q13233	Unlabelled
Q16774	Unlabelled
Q96RU7	Unlabelled
Q96KG9	Unlabelled
Q9NYL2	Unlabelled
Q8IVT5	Unlabelled
Q9UIK4	Unlabelled
Q15119	Unlabelled
Q96C11	Unlabelled
Q9Y6E0	Unlabelled
P31152	Unlabelled
Q5JZY3	Unlabelled
P41240	Unlabelled
Q03426	Unlabelled
Q3LXA3	Unlabelled
Q86TW2	Unlabelled
O75116	Unlabelled
Q9UKE5	Unlabelled
O43252	Unlabelled
P49903	Unlabelled
Q9BVS4	Unlabelled
Q96RG2	Unlabelled
Q13574	Unlabelled
P53779	Unlabelled
Q13464	Unlabelled
Q15349	Unlabelled
Q6ZS86	Unlabelled
P29320	Unlabelled
Q9Y2I7	Unlabelled
O43187	Unlabelled
Q52WX2	Unlabelled
Q9UPE1	Unlabelled
Q5MAI5	Unlabelled
O14733	Unlabelled
Q13315	Unlabelled
Q99986	Unlabelled
Q6P3R8	Unlabelled
Q9H2X6	Unlabelled
P35590	Unlabelled
P09769	Unlabelled
Q8NFU5	Unlabelled
Q96T60	Unlabelled
P78527	Unlabelled
Q9UQ88	Unlabelled
P23677	Unlabelled
Q8TDX7	Unlabelled
O96013	Unlabelled
P46734	Unlabelled
Q13232	Unlabelled
O60307	Unlabelled
Q9P2K8	Unlabelled
Q5TCY1	Unlabelled
P45983	Unlabelled
P06493	Unlabelled
P54764	Unlabelled
P51813	Unlabelled
Q8WTQ7	Unlabelled
Q9NZJ5	Unlabelled
Q99759	Unlabelled
P23443	Unlabelled
Q9UHY1	Unlabelled
P50613	Unlabelled
P41743	Unlabelled
P57058	Unlabelled
Q02156	Unlabelled
Q9Y2H9	Unlabelled
Q16512	Unlabelled
Q9H093	Unlabelled
Q15772	Unlabelled
Q9NSY0	Unlabelled
Q2TB90	Unlabelled
O60825	Unlabelled
P51570	Unlabelled
Q9HBH9	Unlabelled
Q9Y243	Unlabelled
Q13554	Unlabelled
Q9BUB5	Unlabelled
P08237	Unlabelled
Q9Y572	Unlabelled
P21675	Unlabelled
Q15375	Unlabelled
Q8NER5	Unlabelled
Q9HAZ1	Unlabelled
Q86YV6	Unlabelled
Q9H4A3	Unlabelled
P29323	Unlabelled
P51957	Unlabelled
Q96GX5	Unlabelled
P22392	Unlabelled
Q16584	Unlabelled
Q14164	Unlabelled
Q99570	Unlabelled
O75912	Unlabelled
Q14410	Unlabelled
Q96QT4	Unlabelled
Q8IZL9	Unlabelled
Q8WXR4	Unlabelled
O00750	Unlabelled
P43405	Unlabelled
Q9C098	Unlabelled
Q01974	Unlabelled
Q9Y259	Unlabelled
Q96Q15	Unlabelled
Q9BXU1	Unlabelled
Q8TDC3	Unlabelled
P54753	Unlabelled
P41279	Unlabelled
Q96PY6	Unlabelled
P52790	Unlabelled
Q96QP1	Unlabelled
P42356	Unlabelled
P49674	Unlabelled
P27037	Unlabelled
O60285	Unlabelled
Q16659	Unlabelled
P0C1S8	Unlabelled
Q16875	Unlabelled
Q16288	Unlabelled
P27448	Unlabelled
Q14680	Unlabelled
Q9UPQ8	Unlabelled
P60891	Unlabelled
Q9P0L2	Unlabelled
P49760	Unlabelled
Q9NWZ3	Unlabelled
Q6J9G0	Unlabelled
Q9BXM7	Unlabelled
Q8N752	Unlabelled
O14936	Unlabelled
Q12866	Unlabelled
P35557	Unlabelled
Q86Y07	Unlabelled
Q13705	Unlabelled
P51451	Unlabelled
Q13523	Unlabelled
Q9UEW8	Unlabelled
Q59H18	Unlabelled
Q9UHD2	Unlabelled
Q504Y2	Unlabelled
Q96S38	Unlabelled
P52824	Unlabelled
Q96S44	Unlabelled
P14616	Unlabelled
Q9H0K1	Unlabelled
O14757	Unlabelled
P34947	Unlabelled
Q9H4B4	Unlabelled
P0C263	Unlabelled
Q92918	Unlabelled
Q16644	Unlabelled
P42680	Unlabelled
Q13470	Unlabelled
Q9NWW6	Unlabelled
P00568	Unlabelled
Q7RTN6	Unlabelled
Q15120	Unlabelled
Q12851	Unlabelled
Q04912	Unlabelled
Q8IV42	Unlabelled
Q96QS6	Unlabelled
P19367	Unlabelled
Q15131	Unlabelled
Q9Y2H1	Unlabelled
Q96SB4	Unlabelled
P42681	Unlabelled
Q8TDR2	Unlabelled
Q9Y5B8	Unlabelled
Q9UL54	Unlabelled
O75676	Unlabelled
P00558	Unlabelled
Q9H8X2	Unlabelled
O76039	Unlabelled
Q9BYT3	Unlabelled
Q9NY57	Unlabelled
Q96L96	Unlabelled
P48426	Unlabelled
Q53H12	Unlabelled
Q9C0K7	Unlabelled
O95819	Unlabelled
O14976	Unlabelled
Q9H422	Unlabelled
Q6PHR2	Unlabelled
P16118	Unlabelled
Q9H479	Unlabelled
Q92551	Unlabelled
Q8NB16	Unlabelled
P43250	Unlabelled
P50053	Unlabelled
Q96PN8	Unlabelled
Q9UHH9	Unlabelled
O60331	Unlabelled
Q9Y616	Unlabelled
Q8IZE3	Unlabelled
Q9Y3D8	Unlabelled
Q9HBY8	Unlabelled
O15146	Unlabelled
Q13418	Unlabelled
Q86TB3	Unlabelled
Q8IW41	Unlabelled
P52333	Unlabelled
O43781	Unlabelled
Q9Y463	Unlabelled
O00418	Unlabelled
A2RU49	Unlabelled
Q13976	Unlabelled
P42338	Unlabelled
Q15208	Unlabelled
Q96L34	Unlabelled
Q9H3Y6	Unlabelled
P68400	Unlabelled
Q8NEV4	Unlabelled
Q6IQ55	Unlabelled
O00746	Unlabelled
Q16513	Unlabelled
Q9UK32	Unlabelled
O14578	Unlabelled
P0C264	Unlabelled
Q8WZ42	Unlabelled
O43293	Unlabelled
P48730	Unlabelled
P21709	Unlabelled
P11801	Unlabelled
O60229	Unlabelled
Q13535	Unlabelled
O95382	Unlabelled
Q86YV5	Unlabelled
P51956	Unlabelled
P43403	Unlabelled
Q9NQU5	Unlabelled
Q15569	Unlabelled
Q5EBM0	Unlabelled
O75385	Unlabelled
Q13163	Unlabelled
Q9Y6K8	Unlabelled
O60361	Unlabelled
Q96GD4	Unlabelled
P20794	Unlabelled
Q9Y6R4	Unlabelled
Q07002	Unlabelled
Q86SG6	Unlabelled
Q8IVW4	Unlabelled
P36897	Unlabelled
Q9H2K8	Unlabelled
Q9BRS2	Unlabelled
Q9HA64	Unlabelled
Q92772	Unlabelled
Q13557	Unlabelled
P37173	Unlabelled
Q8TE04	Unlabelled
P53778	Unlabelled
P52429	Unlabelled
Q9H999	Unlabelled
Q15139	Unlabelled
Q14004	Unlabelled
Q8IYT8	Unlabelled
Q9UBE8	Unlabelled
Q9P1W9	Unlabelled
Q13188	Unlabelled
Q96BR1	Unlabelled
O14965	Unlabelled
P21127	Unlabelled
O00142	Unlabelled
P78368	Unlabelled
P22694	Unlabelled
P51812	Unlabelled
Q9H792	Unlabelled
O94806	Unlabelled
Q9HCP0	Unlabelled
Q8N2I9	Unlabelled
Q6PFW1	Unlabelled
Q86VZ5	Unlabelled
Q9P286	Unlabelled
Q9UBS0	Unlabelled
Q3MIX3	Unlabelled
O95835	Unlabelled
P21860	Unlabelled
Q01813	Unlabelled
P29376	Unlabelled
Q12852	Unlabelled
P34925	Unlabelled
O43930	Unlabelled
Q8IV63	Unlabelled
Q6DT37	Unlabelled
Q9BX84	Unlabelled
Q9NYA1	Unlabelled
Q16539	Unlabelled
Q13177	Unlabelled
Q9H1R3	Unlabelled
Q7Z695	Unlabelled
Q96M69	Unlabelled
Q8IWU2	Unlabelled
Q01973	Unlabelled
P54762	Unlabelled
P00540	Unlabelled
Q14296	Unlabelled
Q92630	Unlabelled
Q6VAB6	Unlabelled
P31751	Unlabelled
Q96LW2	Unlabelled
Q15118	Unlabelled
Q6ZN16	Unlabelled
Q9Y223	Unlabelled
O75962	Unlabelled
Q14409	Unlabelled
Q96Q04	Unlabelled
Q8TCG2	Unlabelled
Q16816	Unlabelled
P19525	Unlabelled
P42679	Unlabelled
P30291	Unlabelled
Q13237	Unlabelled
Q9NRA0	Unlabelled
Q15303	Unlabelled
Q9UQM7	Unlabelled
Q86UE8	Unlabelled
Q16854	Unlabelled
Q5SY16	Unlabelled
P49842	Unlabelled
P19784	Unlabelled
Q9H477	Unlabelled
P52789	Unlabelled
Q13164	Unlabelled
Q6P3W7	Unlabelled
Q9Y5S2	Unlabelled
Q9UEE5	Unlabelled
O43314	Unlabelled
O75716	Unlabelled
Q9UPZ9	Unlabelled
O75747	Unlabelled
O15264	Unlabelled
Q9UQ07	Unlabelled
Q6A1A2	Unlabelled
Q02779	Unlabelled
Q8TBX8	Unlabelled
P05129	Unlabelled
O95544	Unlabelled
P17612	Unlabelled
Q9BXA7	Unlabelled
Q86UX6	Unlabelled
Q9NRM7	Unlabelled
P30530	Unlabelled
P22612	Unlabelled
Q2M2I8	Unlabelled
Q15831	Unlabelled
P35790	Unlabelled
Q96M32	Unlabelled
Q9BRR6	Unlabelled
Q8N4C8	Unlabelled
O96017	Unlabelled

## Sheet: Protease
P14780	Positive
P08709	Positive
P50281	Positive
P08254	Positive
P24347	Positive
P08253	Positive
Q9Y5R2	Positive
Q9Y4W6	Positive
P29466	Positive
O75900	Positive
P12821	Positive
P39900	Positive
P45452	Positive
P51511	Positive
P00750	Positive
P08246	Positive
P08473	Positive
P00742	Positive
Q99542	Positive
P42574	Positive
P28074	Positive
P15144	Positive
P28062	Positive
Q9ULZ9	Positive
P05981	Positive
P28065	Positive
P14735	Positive
Q9H239	Positive
Q9NPA2	Positive
P09238	Positive
P51512	Positive
Q9NRE1	Positive
P09237	Positive
P00734	Positive
Q9H306	Positive
P40306	Positive
P00748	Positive
O60882	Positive
P20618	Positive
P53582	Positive
P00740	Positive
Q07075	Positive
P49721	Positive
P0DJD9	Positive
Q9Y646	Positive
P16444	Positive
P03956	Positive
Q04609	Positive
Q9BYF1	Positive
P00747	Positive
P00797	Positive
P08519	Positive
Q9ULA0	Positive
P04070	Positive
P27487	Positive
Q8N119	Positive
P22894	Positive
P00749	Positive
P50579	Positive
O75976	Unlabelled
Q99797	Unlabelled
Q8IYP2	Unlabelled
O95630	Unlabelled
Q8TCT7	Unlabelled
A6NFU8	Unlabelled
Q7RTY7	Unlabelled
P48740	Unlabelled
Q9UHI8	Unlabelled
Q9NQH7	Unlabelled
Q58DX5	Unlabelled
Q6GPI1	Unlabelled
P10144	Unlabelled
P83111	Unlabelled
P45974	Unlabelled
P15088	Unlabelled
Q9HC62	Unlabelled
Q9UHP3	Unlabelled
Q9NQE7	Unlabelled
P78325	Unlabelled
Q9UGI0	Unlabelled
Q86TI2	Unlabelled
Q9BXU7	Unlabelled
Q92743	Unlabelled
Q8TE57	Unlabelled
O43323	Unlabelled
Q9Y6L7	Unlabelled
Q8WXS8	Unlabelled
A8MTI9	Unlabelled
Q9UDY8	Unlabelled
O95450	Unlabelled
Q96FW1	Unlabelled
Q13443	Unlabelled
P25788	Unlabelled
O14672	Unlabelled
P35125	Unlabelled
Q6NTF9	Unlabelled
P09958	Unlabelled
P00736	Unlabelled
Q70CQ4	Unlabelled
A8MUK1	Unlabelled
Q8TAC2	Unlabelled
P55212	Unlabelled
Q9UKP4	Unlabelled
Q86W34	Unlabelled
O43462	Unlabelled
Q9P0G3	Unlabelled
P02788	Unlabelled
Q70CQ2	Unlabelled
P40818	Unlabelled
P07384	Unlabelled
O14818	Unlabelled
P23946	Unlabelled
A8MX76	Unlabelled
Q9UKR3	Unlabelled
P63127	Unlabelled
Q9UQ90	Unlabelled
P16519	Unlabelled
Q9Y6H3	Unlabelled
Q13107	Unlabelled
P10619	Unlabelled
O94782	Unlabelled
Q9UQQ1	Unlabelled
P49863	Unlabelled
P58872	Unlabelled
Q7RTY8	Unlabelled
Q9UKJ8	Unlabelled
Q9UL52	Unlabelled
Q15661	Unlabelled
Q96K76	Unlabelled
Q96KR4	Unlabelled
Q16549	Unlabelled
Q9UJW2	Unlabelled
P28838	Unlabelled
Q7Z410	Unlabelled
Q7RTY5	Unlabelled
Q96LU5	Unlabelled
Q9NUQ7	Unlabelled
Q9H3G5	Unlabelled
Q9UKU6	Unlabelled
Q9BQR3	Unlabelled
P78536	Unlabelled
P58397	Unlabelled
Q9Y5Z0	Unlabelled
P31944	Unlabelled
O43464	Unlabelled
Q9BXP8	Unlabelled
Q495T6	Unlabelled
P52888	Unlabelled
P29122	Unlabelled
Q8TC27	Unlabelled
P28066	Unlabelled
P17655	Unlabelled
P10265	Unlabelled
P60900	Unlabelled
O43184	Unlabelled
P20718	Unlabelled
Q0WX57	Unlabelled
Q9NVE5	Unlabelled
Q70EL4	Unlabelled
Q2T9J0	Unlabelled
Q9BZJ3	Unlabelled
P63128	Unlabelled
Q9UKF5	Unlabelled
P48147	Unlabelled
Q9UKQ9	Unlabelled
Q7RTY3	Unlabelled
Q5VU57	Unlabelled
Q9Y337	Unlabelled
O60235	Unlabelled
P06870	Unlabelled
Q8NFA0	Unlabelled
P20151	Unlabelled
P63122	Unlabelled
P51784	Unlabelled
Q53RT3	Unlabelled
Q14520	Unlabelled
Q8N4T0	Unlabelled
Q9HB40	Unlabelled
P29144	Unlabelled
P63119	Unlabelled
Q8NBP7	Unlabelled
P78509	Unlabelled
Q7RTY9	Unlabelled
Q7Z2K6	Unlabelled
Q99965	Unlabelled
P15085	Unlabelled
Q9UNA0	Unlabelled
Q86WA8	Unlabelled
Q9UMW8	Unlabelled
P20231	Unlabelled
Q9Y3Q7	Unlabelled
Q92851	Unlabelled
Q9UPT9	Unlabelled
Q9NQC7	Unlabelled
Q92905	Unlabelled
P56730	Unlabelled
Q9H4A4	Unlabelled
P25786	Unlabelled
P42892	Unlabelled
O14815	Unlabelled
Q400G9	Unlabelled
Q96JH7	Unlabelled
Q6UWB4	Unlabelled
Q8TEY7	Unlabelled
P36776	Unlabelled
Q9Y4P1	Unlabelled
Q96T52	Unlabelled
O00487	Unlabelled
Q8NEM8	Unlabelled
Q76LX8	Unlabelled
P09093	Unlabelled
Q9UP79	Unlabelled
Q86TL0	Unlabelled
P25787	Unlabelled
P0CW18	Unlabelled
P13497	Unlabelled
Q9UKF2	Unlabelled
Q9NY33	Unlabelled
P17538	Unlabelled
P49810	Unlabelled
Q70CQ3	Unlabelled
P12544	Unlabelled
Q9Y6I0	Unlabelled
Q9P2H5	Unlabelled
P40313	Unlabelled
Q8TEB9	Unlabelled
P51878	Unlabelled
P09668	Unlabelled
P20807	Unlabelled
Q8TE49	Unlabelled
A5LHX3	Unlabelled
Q9BYE2	Unlabelled
O15072	Unlabelled
P09936	Unlabelled
Q6Q4G3	Unlabelled
Q9Y6W3	Unlabelled
Q16651	Unlabelled
A1L453	Unlabelled
Q8TB40	Unlabelled
Q6QN14	Unlabelled
Q8TCT9	Unlabelled
Q5VVQ6	Unlabelled
Q7Z5A4	Unlabelled
Q99538	Unlabelled
Q86T82	Unlabelled
Q13867	Unlabelled
P53634	Unlabelled
Q8NF86	Unlabelled
Q96LD8	Unlabelled
Q8NB14	Unlabelled
Q8N608	Unlabelled
Q6MZZ7	Unlabelled
Q9UKP5	Unlabelled
Q8NBH2	Unlabelled
Q14623	Unlabelled
Q5U5Z8	Unlabelled
O00187	Unlabelled
O15484	Unlabelled
Q9HAU8	Unlabelled
Q6UWY2	Unlabelled
Q6ZMR5	Unlabelled
P08218	Unlabelled
Q66K79	Unlabelled
Q6P179	Unlabelled
P15374	Unlabelled
P55211	Unlabelled
P35030	Unlabelled
P51124	Unlabelled
A6NCW0	Unlabelled
O43897	Unlabelled
Q6URH7	Unlabelled
Q96CC6	Unlabelled
O60259	Unlabelled
Q9Y5K5	Unlabelled
P59510	Unlabelled
O00507	Unlabelled
P0DJD7	Unlabelled
Q9UKQ2	Unlabelled
P61009	Unlabelled
Q6PJF5	Unlabelled
Q9H3M9	Unlabelled
P57727	Unlabelled
Q92824	Unlabelled
Q9Y5T5	Unlabelled
P24158	Unlabelled
Q9UK80	Unlabelled
Q9UHL4	Unlabelled
O43847	Unlabelled
Q9H4A9	Unlabelled
Q9NQW7	Unlabelled
Q9Y6I4	Unlabelled
Q9H6P5	Unlabelled
Q9H2R5	Unlabelled
P62068	Unlabelled
P15086	Unlabelled
Q8N436	Unlabelled
P06681	Unlabelled
P83105	Unlabelled
P15169	Unlabelled
Q2L4Q9	Unlabelled
Q9H0E7	Unlabelled
P25774	Unlabelled
Q9H9J4	Unlabelled
Q9Y2K6	Unlabelled
P54252	Unlabelled
P54578	Unlabelled
P07288	Unlabelled
Q14790	Unlabelled
Q86WS5	Unlabelled
O14773	Unlabelled
P55786	Unlabelled
O96009	Unlabelled
P56817	Unlabelled
Q14694	Unlabelled
A6NNY8	Unlabelled
Q9UKR0	Unlabelled
O75844	Unlabelled
A6NHC0	Unlabelled
Q9H013	Unlabelled
Q86T26	Unlabelled
P07478	Unlabelled
Q96MI9	Unlabelled
Q93009	Unlabelled
O94966	Unlabelled
P07477	Unlabelled
Q9BQF6	Unlabelled
Q8NDH3	Unlabelled
Q9Y4E8	Unlabelled
P08217	Unlabelled
Q13219	Unlabelled
Q7RTZ1	Unlabelled
O60911	Unlabelled
P05156	Unlabelled
P46736	Unlabelled
Q10713	Unlabelled
P49768	Unlabelled
Q92560	Unlabelled
Q70EL3	Unlabelled
Q9Y5K2	Unlabelled
Q9P0U3	Unlabelled
O15204	Unlabelled
Q8IUH8	Unlabelled
P09960	Unlabelled
Q8NB37	Unlabelled
Q9HC96	Unlabelled
Q96E52	Unlabelled
P63129	Unlabelled
P67812	Unlabelled
Q16820	Unlabelled
P07339	Unlabelled
Q9NUJ1	Unlabelled
Q86UV5	Unlabelled
Q9GZR1	Unlabelled
P49662	Unlabelled
Q6UXS9	Unlabelled
O75173	Unlabelled
Q92995	Unlabelled
P43235	Unlabelled
O43506	Unlabelled
O95672	Unlabelled
Q96IY4	Unlabelled
P56202	Unlabelled
Q9H4B8	Unlabelled
P08311	Unlabelled
Q93008	Unlabelled
Q8TE59	Unlabelled
Q15040	Unlabelled
Q12765	Unlabelled
Q8TCT6	Unlabelled
Q8N6M6	Unlabelled
Q9UPW5	Unlabelled
Q9UPU5	Unlabelled
Q16819	Unlabelled
O75439	Unlabelled
Q3LFD5	Unlabelled
Q9UIQ6	Unlabelled
Q9Y6A9	Unlabelled
P42785	Unlabelled
Q9Y256	Unlabelled
P55210	Unlabelled
P63131	Unlabelled
Q6UW60	Unlabelled
O75604	Unlabelled
O75783	Unlabelled
P52948	Unlabelled
Q6R6M4	Unlabelled
Q6GTS8	Unlabelled
Q70EK8	Unlabelled
P07858	Unlabelled
Q6ZWK6	Unlabelled
A4D1T9	Unlabelled
O15393	Unlabelled
Q6HA08	Unlabelled
Q04756	Unlabelled
P07711	Unlabelled
Q13444	Unlabelled
Q96DC9	Unlabelled
Q9Y5Y6	Unlabelled
Q9BYT8	Unlabelled
Q9UQ80	Unlabelled
Q9Y5B9	Unlabelled
Q96DT6	Unlabelled
A6NEC2	Unlabelled
Q9Y6M0	Unlabelled
Q9P2N4	Unlabelled
Q96FJ0	Unlabelled
Q8WXQ8	Unlabelled
Q96TA2	Unlabelled
Q9UNI1	Unlabelled
Q15005	Unlabelled
Q99436	Unlabelled
Q6PEW0	Unlabelled
P49720	Unlabelled
Q8TE58	Unlabelled
Q70EL2	Unlabelled
P0C7V7	Unlabelled
P25789	Unlabelled
P14091	Unlabelled
Q7RTZ2	Unlabelled
P14384	Unlabelled
E7EML9	Unlabelled
P10323	Unlabelled
Q9Y3Q0	Unlabelled
O43895	Unlabelled
Q9NRS4	Unlabelled
Q9H4L4	Unlabelled
P12955	Unlabelled
Q5K4E3	Unlabelled
O75808	Unlabelled
P42575	Unlabelled
Q8IYS1	Unlabelled
Q99895	Unlabelled
P48052	Unlabelled
Q96HI0	Unlabelled
Q6V1X1	Unlabelled
P63121	Unlabelled
P78562	Unlabelled
Q9P275	Unlabelled
Q96SM3	Unlabelled
P23276	Unlabelled
Q8N3Z0	Unlabelled
O15519	Unlabelled
Q15465	Unlabelled
Q8TE56	Unlabelled
P03951	Unlabelled
Q14703	Unlabelled
A6NIE9	Unlabelled
P0DJD8	Unlabelled
Q99497	Unlabelled
Q9NZ08	Unlabelled
O95084	Unlabelled
Q53GS9	Unlabelled
Q8NDL9	Unlabelled
Q6UB28	Unlabelled
Q9UMQ6	Unlabelled
Q9UI38	Unlabelled
Q70EK9	Unlabelled
Q70CQ1	Unlabelled
P0CB46	Unlabelled
P28070	Unlabelled
Q8WYN0	Unlabelled
Q4J6C6	Unlabelled
Q9BZ11	Unlabelled
Q8TAA3	Unlabelled
P63124	Unlabelled
P49862	Unlabelled
O75077	Unlabelled
Q9UBR2	Unlabelled
Q9H3S3	Unlabelled
P29120	Unlabelled
Q9BY50	Unlabelled
Q5JRX3	Unlabelled
P20142	Unlabelled
Q0VDG4	Unlabelled
Q9UBX1	Unlabelled
Q12884	Unlabelled
P00751	Unlabelled
Q8IVL8	Unlabelled
Q9HBJ7	Unlabelled
Q9H324	Unlabelled
Q9UBX7	Unlabelled
Q9NX52	Unlabelled
Q8WTS1	Unlabelled
Q6UXH9	Unlabelled
P63120	Unlabelled
Q92876	Unlabelled
Q9NXJ5	Unlabelled
Q9HBA9	Unlabelled
Q96KN2	Unlabelled
P03952	Unlabelled
Q8TCT8	Unlabelled
Q9H2U9	Unlabelled
Q9GZN4	Unlabelled
Q2TV78	Unlabelled
Q8NHM4	Unlabelled
O75078	Unlabelled
O43240	Unlabelled
Q96KP4	Unlabelled
Q9NRR2	Unlabelled
Q8N594	Unlabelled
Q6NVU6	Unlabelled
P43234	Unlabelled
P28072	Unlabelled
Q92643	Unlabelled
Q96G74	Unlabelled
P16870	Unlabelled
Q9Y5Q5	Unlabelled
O60344	Unlabelled
P00746	Unlabelled
Q8IU80	Unlabelled
P98073	Unlabelled
Q96RU2	Unlabelled
O75317	Unlabelled
Q6ZSI9	Unlabelled
Q8IUX7	Unlabelled
Q9NZP8	Unlabelled
Q96FV2	Unlabelled
Q5VVJ2	Unlabelled
Q9UI42	Unlabelled
P63123	Unlabelled
Q9H300	Unlabelled
P63125	Unlabelled
Q16740	Unlabelled
P09871	Unlabelled
Q5NE16	Unlabelled
P83110	Unlabelled
P21580	Unlabelled
Q6GQQ9	Unlabelled
P08861	Unlabelled
Q14674	Unlabelled
Q8TE60	Unlabelled
